# Supplementary material for: Network Pharmacology-Based Strategy to Investigate Pharmacological Mechanisms of the Drug Pair Astragalus-Angelica for Treatment of Male Infertility
Source: Hindawi journal article supplement (doi:10.1155/2021/8281506), 2021-10-16
Supplement: f1 [file 8281506.f1.zip]

| Ingredient | Target  |
|------------|---------|
| Astragalos | CXCR4   |
| Chrysanth  | ADA     |
| Chrysanth  | ITFG2   |
| Chrysanth  | DGUOK   |
| Chrysanth  | XDH     |
| Chrysanth  | ADORA1  |
| Soyasapon  | NR3C1   |
| Soyasapon  | ATP1A1  |
| Soyasapog  | ESR1    |
| Soyasapog  | PGR     |
| Soyasapog  | AR      |
| Soyasapog  | NR3C1   |
| Soyasapog  | ANXA1   |
| Astrameml  | CXCR4   |
| Kaempferc  | HSD17B1 |
| Kaempferc  | CRYZ    |
| Kaempferc  | VKORC1  |
| Kaempferc  | NQO1    |
| Astragalos | CXCR4   |
| Astragalos | CXCR4   |
| Sucrose    | CXCR4   |
| Sucrose    | NFKB2   |
| Sucrose    | TNF     |
| Sucrose    | MMP9    |
| Sucrose    | IFNG    |
| Astragalos | CXCR4   |
| 3,5-Dimetl | PDE4A   |
| 3,5-Dimetl | PDE3A   |
| 3,5-Dimetl | CACNA1C |
| 3,5-Dimetl | TRDMT1  |
| 3,5-Dimetl | DHFRL1  |
| 3,5-Dimetl | DHFR    |
| 3,5-Dimetl | PDE10A  |
| 3,5-Dimetl | PDE2A   |
| 3,5-Dimetl | TYMS    |
| 3,5-Dimetl | SHMT1   |
| 3,5-Dimetl | PDE3B   |
| 3,5-Dimetl | DMTN    |
| 3,5-Dimetl | KCNMA1  |
| 3,5-Dimetl | ABCC2   |
| 3,5-Dimetl | FOLR2   |
| 3,5-Dimetl | PDE5A   |
| 3,5-Dimetl | PDE9A   |
| 3,5-Dimetl | TBPL1   |
| 3,5-Dimetl | DNMT3A  |
| 3,5-Dimetl | STUB1   |
| 3,5-Dimetl | INSR    |
| 3,5-Dimetl | P2RX2   |
| 3,5-Dimetl | HTR2A   |
| 3,5-Dimetl | SIRT2   |
| 3,5-Dimetl | HCN4    |
| 3,5-Dimetl | DPYD    |
| 3,5-Dimetl | HOXA5   |
| 3,5-Dimetl | FBLN1   |
| 3,5-Dimetl | SLC22A6 |
| 3,5-Dimetl | ASNS    |
| 3,5-Dimetl | ADK     |

3,5-Dimethyl IL1B  
3,5-Dimethyl NT5M  
3,5-Dimethyl P2RX3  
3,5-Dimethyl AURKA  
3,5-Dimethyl GAS6  
3,5-Dimethyl CMPK2  
3,5-Dimethyl PDE1B  
3,5-Dimethyl DPYS  
3,5-Dimethyl CHRNA3  
3,5-Dimethyl HSP90AB1  
3,5-Dimethyl CHRNA2  
3,5-Dimethyl SLC6A4  
3,5-Dimethyl DUT  
3,5-Dimethyl RAPGEF2  
3,5-Dimethyl ATIC  
3,5-Dimethyl AK9  
3,5-Dimethyl CDKN1A  
3,5-Dimethyl HIF1A  
3,5-Dimethyl FOLR1  
3,5-Dimethyl RAB8B  
3,5-Dimethyl HYAL2  
3,5-Dimethyl DNMT3B  
3,5-Dimethyl HSP90AA1  
3,5-Dimethyl DNMT1  
3,5-Dimethyl PARP10  
3,5-Dimethyl CHRNA4  
3,5-Dimethyl MGMT  
3,5-Dimethyl DTYMK  
3,5-Dimethyl PDE11A  
3,5-Dimethyl HCN2  
20-Hexadecyl PRKCA  
20-Hexadecyl PRKCD  
20-Hexadecyl PTGER4  
20-Hexadecyl PTGER2  
20-Hexadecyl PTGER3  
20-Hexadecyl CD300A  
20-Hexadecyl CHGA  
20-Hexadecyl APOC2  
20-Hexadecyl KIF14  
20-Hexadecyl PRKCB  
Adenine ADORA2A  
Adenine ADORA2B  
Adenine ADORA3  
Adenine ADORA1  
Adenine FBP1  
Adenine PRKAB1  
Adenine ACSS2  
Adenine POLE  
Adenine CBS  
Adenine POLE3  
Adenine ADCY1  
Adenine COMT  
Adenine POLA1  
Adenine DCK  
Adenine RRM2B  
Adenine ADK  
Adenine GNMT  
Adenine PNP

|            |          |
|------------|----------|
| Adenine    | PDE4D    |
| Adenine    | CBSL     |
| Adenine    | RRM2     |
| Adenine    | PRKAA1   |
| Adenine    | MAT1A    |
| Adenine    | CREB1    |
| Adenine    | ACSS1    |
| Adenine    | PIM1     |
| Adenine    | PYGL     |
| Adenine    | POLE2    |
| Adenine    | HINT1    |
| Adenine    | MAT2A    |
| Adenine    | AMD1     |
| Adenine    | ACSL1    |
| Adenine    | PDE4B    |
| Adenine    | PRKAB2   |
| Adenine    | POLE4    |
| Adenine    | RRM1     |
| Adenine    | MTAP     |
| Adenine    | PRPS1    |
| Astragalos | SLC47A1  |
| Astragalos | CYP3A4   |
| Astragalos | CYP51A1  |
| Astragalos | KCNH2    |
| Astragalos | ATP1A1   |
| Astragalos | MLNR     |
| Astragalos | SLCO1B3  |
| Astragalos | ALB      |
| Astragalos | ABCB1    |
| Astragalos | SLCO1B1  |
| Astragalos | SLC47A1  |
| Astragalos | CYP3A4   |
| Astragalos | CYP51A1  |
| Astragalos | KCNH2    |
| Astragalos | ATP1A1   |
| Astragalos | MLNR     |
| Astragalos | SLCO1B3  |
| Astragalos | ALB      |
| Astragalos | ABCB1    |
| Astragalos | SLCO1B1  |
| Betaine    | PPAT     |
| Betaine    | NPY2R    |
| Betaine    | CTPS1    |
| Betaine    | CPS1     |
| Betaine    | SST      |
| Betaine    | GLUL     |
| Betaine    | GOT2     |
| Betaine    | SLC1A1   |
| Betaine    | ACY3     |
| Betaine    | ASPA     |
| Betaine    | ADSSL1   |
| Betaine    | ASNS     |
| Betaine    | DARS2    |
| Betaine    | GOT1     |
| Betaine    | ASPH     |
| Betaine    | SLC25A12 |
| Betaine    | DARS     |
| Betaine    | ASRGL1   |

|             |          |
|-------------|----------|
| Betaine     | RNASE1   |
| Betaine     | ASS1     |
| Betaine     | ADSS     |
| Betaine     | CAD      |
| Betaine     | ACY1     |
| Betaine     | SLC25A13 |
| Betaine     | LYZ      |
| Betaine     | PAICS    |
| Betaine     | BCAT1    |
| Betaine     | VARs     |
| Betaine     | TARS     |
| Betaine     | THNSL1   |
| Betaine     | TARS2    |
| Betaine     | PCCB     |
| Betaine     | SLC5A6   |
| Betaine     | UGCG     |
| Betaine     | LIAS     |
| Betaine     | TH       |
| Betaine     | LIPT1    |
| Betaine     | HPD      |
| Betaine     | TPH1     |
| Betaine     | PAH      |
| Betaine     | NOS3     |
| Beta-Sitosi | ESR1     |
| Beta-Sitosi | PGR      |
| Beta-Sitosi | VDR      |
| Beta-Sitosi | CYP27B1  |
| Beta-Sitosi | GC       |
| Beta-Sitosi | SNW1     |
| Beta-Sitosi | AR       |
| Beta-Sitosi | NR3C1    |
| Beta-Sitosi | NFKB1    |
| Beta-Sitosi | AKR1C3   |
| Beta-Sitosi | CYP24A1  |
| Beta-Sitosi | GPBAR1   |
| Beta-Sitosi | SNAI2    |
| Beta-Sitosi | MED1     |
| Beta-Sitosi | SNAI1    |
| Beta-Sitosi | CYP3A4   |
| Beta-Sitosi | CALB1    |
| Beta-Sitosi | FGF23    |
| Beta-Sitosi | GFI1     |
| Beta-Sitosi | LANCL2   |
| Beta-Sitosi | WNT4     |
| Beta-Sitosi | TCF3     |
| Beta-Sitosi | BAX      |
| Beta-Sitosi | KL       |
| Beta-Sitosi | CYP2R1   |
| Beta-Sitosi | PML      |
| Beta-Sitosi | B4GALT1  |
| Beta-Sitosi | S100G    |
| Beta-Sitosi | CYP27A1  |
| Beta-Sitosi | KANK2    |
| Beta-Sitosi | IRX5     |
| Beta-Sitosi | RXRA     |
| Beta-Sitosi | NR1H4    |
| Beta-Sitosi | TRIM24   |
| Canavanin   | AZIN2    |

Canavanin|ASL  
Canavanin|NOS2  
Canavanin|SLC7A3  
Canavanin|ASS1  
Canavanin|SLC7A1  
Canavanin|SLC7A4  
Canavanin|NOS3  
Canavanin|ARG2  
Canavanin|HMOX1  
Canavanin|OAZ3  
Canavanin|AGMAT  
Canavanin|KLF4  
Canavanin|GNRH1  
Canavanin|ARG1  
Canavanin|AZIN1  
Canavanin|OTC  
Canavanin|SLC1A5  
Canavanin|GOT2  
Canavanin|GPT2  
Canavanin|BAAT  
Canavanin|SHMT1  
Canavanin|ABAT  
Canavanin|SLC1A1  
Canavanin|SLC7A2  
Canavanin|GCSH  
Canavanin|SLC7A8  
Canavanin|PPAT  
Canavanin|ACY3  
Canavanin|ASPA  
Canavanin|IARS2  
Canavanin|GLRA2  
Canavanin|ALAS1  
Canavanin|BCAT1  
Canavanin|GCAT  
Canavanin|SLC38A3  
Canavanin|VARS  
Canavanin|NFS1  
Canavanin|SLC25A15  
Canavanin|SLC1A4  
Canavanin|ADSSL1  
Canavanin|VDAC3  
Canavanin|GSS  
Canavanin|ASNS  
Canavanin|GLRA3  
Canavanin|DARS2  
Canavanin|GRIN3B  
Canavanin|LCMT1  
Canavanin|GRIN2A  
Canavanin|GOT1  
Canavanin|GNMT  
Canavanin|GLRB  
Canavanin|GLYAT  
Canavanin|AARS2  
Canavanin|ASPH  
Canavanin|GPR18  
Canavanin|CTPS1  
Canavanin|SLC25A12  
Canavanin|PHYKPL

Canavanin|GLYATL1  
Canavanin|GATM  
Canavanin|LARS  
Canavanin|NARS2  
Canavanin|TNNC1  
Canavanin|DARS  
Canavanin|GRIN2C  
Canavanin|OAT  
Canavanin|GLDC  
Canavanin|VDAC2  
Canavanin|OAZ2  
Canavanin|PIPOX  
Canavanin|SLC25A2  
Canavanin|GARS  
Canavanin|GPT  
Canavanin|AARS  
Canavanin|SHMT2  
Canavanin|ALAS2  
Canavanin|VDAC1  
Canavanin|SLC6A9  
Canavanin|ASRGL1  
Canavanin|GLYATL2  
Canavanin|SLC32A1  
Canavanin|OAZ1  
Canavanin|KARS  
Canavanin|AGXT  
Canavanin|LARS2  
Canavanin|RNASE1  
Canavanin|ADSS  
Canavanin|SLC36A1  
Canavanin|ACADSB  
Canavanin|SLC6A5  
Canavanin|CAD  
Canavanin|PCCB  
Canavanin|GLUL  
Canavanin|AGXT2  
Canavanin|IARS  
Canavanin|BCAT2  
Canavanin|ACY1  
Canavanin|KYNL  
Canavanin|SLC25A13  
Canavanin|GLRA1  
Canavanin|LYZ  
Canavanin|LCMT2  
Canavanin|PAICS  
Canavanin|NARS  
Canavanin|DGAT2  
Canavanin|CYBA  
Canavanin|RARS  
Canavanin|P2RX2  
Canavanin|TPH2  
Canavanin|EDN1  
Canavanin|SLC24A2  
Canavanin|PRLR  
Canavanin|HTR2B  
Canavanin|PAOX  
Canavanin|MTRR  
Canavanin|TH

Canavanin|EDN3  
Canavanin|IL1B  
Canavanin|BAK1  
Canavanin|POR  
Canavanin|PQLC2  
Canavanin|HMBS  
Canavanin|TPH1  
Canavanin|TAF7  
Canavanin|BCL2L11  
Canavanin|ECE1  
Canavanin|FCER2  
Canavanin|NDOR1  
Canavanin|IFNG  
Canavanin|F2RL1  
Canavanin|DDC  
Canavanin|PAM  
Canavanin|SLC11A1  
Canavanin|AIF1  
Canavanin|SLC3A1  
Canavanin|SLC11A2  
Canavanin|MT3  
Canavanin|SLC7A7  
Canavanin|UROS  
Canavanin|CPS1  
Canavanin|BAD  
Canavanin|LCN2  
Canavanin|ODC1  
Canavanin|ADSL  
Canavanin|NAGS  
Canavanin|CERS1  
Canavanin|NOS1  
Canavanin|EDN2  
Choline |PLD1  
Choline |PCYT1A  
Choline |PCYT1B  
Choline |PHOSPHO1  
Choline |ACHE  
Choline |PLD2  
Choline |BCHE  
Choline |COLQ  
Choline |SLC5A7  
Choline |HMOX1  
Choline |NRG1  
Choline |DMGDH  
Choline |SIX3  
Choline |RAP1GAP  
Choline |CRP  
Choline |NAPEPLD  
Choline |FSCN1  
Choline |PRSS12  
Choline |KLF5  
Choline |SLC44A4  
Choline |ALDH7A1  
Choline |DNM3  
Choline |PLD4  
Choline |ASCL1  
Choline |GPLD1  
Choline |ENPP6

Choline CDH8  
Choline PLD3  
Choline PODXL  
Choline FNTA  
Choline AGRN  
Choline CHKA  
Choline CHDH  
Choline ATP8B1  
Choline GRIN1  
Gamma-Si ESR1  
Gamma-Si PGR  
Gamma-Si VDR  
Gamma-Si CYP27B1  
Gamma-Si GC  
Gamma-Si SNW1  
Gamma-Si AR  
Gamma-Si NR3C1  
Gamma-Si NFKB1  
Gamma-Si AKR1C3  
Gamma-Si CYP24A1  
Gamma-Si GPBAR1  
Gamma-Si SNAI2  
Gamma-Si MED1  
Gamma-Si SNAI1  
Gamma-Si CYP3A4  
Gamma-Si CALB1  
Gamma-Si FGF23  
Gamma-Si GFI1  
Gamma-Si LANCL2  
Gamma-Si WNT4  
Gamma-Si TCF3  
Gamma-Si BAX  
Gamma-Si KL  
Gamma-Si CYP2R1  
Gamma-Si PML  
Gamma-Si B4GALT1  
Gamma-Si S100G  
Gamma-Si CYP27A1  
Gamma-Si KANK2  
Gamma-Si IRX5  
Gamma-Si RXRA  
Gamma-Si NR1H4  
Gamma-Si TRIM24  
Guanosine POLA1  
Guanosine ADORA2A  
Guanosine POLB  
Guanosine DNMT1  
Guanosine PNP  
Guanosine ADORA2B  
Guanosine ADORA3  
Guanosine ADORA1  
Guanosine TCN1  
Guanosine MUT  
Guanosine MMAB  
Guanosine MTRR  
Guanosine MTR  
Guanosine CUBN  
Guanosine AMN



Guanosine MMACHC  
Guanosine MMAA  
Guanosine UHRF1  
Guanosine DNMT3A  
Guanosine POLE  
Guanosine BRCA1  
Guanosine PRKDC  
Guanosine KDM1A  
Guanosine POLG  
Guanosine LIG4  
Guanosine USP7  
Guanosine TCF3  
Guanosine POLD1  
Guanosine PAX5  
Guanosine TRDMT1  
Guanosine TACR2  
Guanosine UHRF2  
Guanosine DNMT3B  
Guanosine CTCF  
Guanosine KDM3A  
Guanosine MGMT  
Guanosine HELLS  
Lupeol VDR  
Lupeol CYP27B1  
Lupeol GC  
Lupeol SNW1  
Lupeol TRPV3  
Lupeol ESR1  
Lupeol PGR  
Lupeol OPRK1  
Lupeol TRPM8  
Lupeol TRPA1  
Lupeol NFKB1  
Lupeol AKR1C3  
Lupeol CYP24A1  
Lupeol GPBAR1  
Lupeol SNAI2  
Lupeol MED1  
Lupeol SNAI1  
Lupeol CYP3A4  
Lupeol CALB1  
Lupeol FGF23  
Lupeol GFI1  
Lupeol LANCL2  
Lupeol WNT4  
Lupeol TCF3  
Lupeol BAX  
Lupeol KL  
Lupeol CYP2R1  
Lupeol PML  
Lupeol B4GALT1  
Lupeol S100G  
Lupeol CYP27A1  
Lupeol KANK2  
Lupeol IRX5  
Lupeol RXRA  
Lupeol NR1H4  
Lupeol TRIM24

|           |        |
|-----------|--------|
| Quercetin | HTR2A  |
| Quercetin | HTR2B  |
| Quercetin | ADRA2A |
| Quercetin | HTR1B  |
| Quercetin | HTR2C  |
| Quercetin | HTR1D  |
| Quercetin | DRD2   |
| Quercetin | DRD4   |
| Quercetin | HTR1A  |
| Quercetin | ADRA2C |
| Quercetin | CALY   |
| Quercetin | DRD3   |
| Quercetin | DRD5   |
| Quercetin | DRD1   |
| Quercetin | ADRA2B |
| Uridine   | TYMS   |
| Uridine   | NT5C2  |
| Uridine   | ADK    |
| Uridine   | IMPDH1 |
| Uridine   | ENPP1  |
| Uridine   | POLA1  |
| Uridine   | PNP    |
| Uridine   | POLB   |
| Uridine   | TERT   |
| Uridine   | GSR    |
| Uridine   | GCDH   |
| Uridine   | ERO1B  |
| Uridine   | IVD    |
| Uridine   | NQO2   |
| Uridine   | DPYD   |
| Uridine   | POR    |
| Uridine   | CYB5R1 |
| Uridine   | MAOB   |
| Uridine   | FDXR   |
| Uridine   | DAO    |
| Uridine   | TXNRD1 |
| Uridine   | ACADS  |
| Uridine   | CYB5R3 |
| Uridine   | MAOA   |
| Uridine   | IL4I1  |
| Uridine   | AIFM1  |
| Uridine   | ACOX1  |
| Uridine   | ACADM  |
| Uridine   | NQO1   |
| Uridine   | XDH    |
| Uridine   | DNMT1  |
| Uridine   | ACAD8  |
| Uridine   | NOS1   |
| Uridine   | DLD    |
| Uridine   | GFER   |
| Uridine   | AK5    |
| Uridine   | GUK1   |
| Uridine   | ANKH   |
| Uridine   | ENPP3  |
| Uridine   | APRT   |
| Uridine   | AK9    |
| Uridine   | NUDT12 |
| Uridine   | IMPDH2 |
