# Supplementary material for: Network Pharmacology-Based Strategy to Investigate Pharmacological Mechanisms of the Drug Pair Astragalus-Angelica for Treatment of Male Infertility
Source: Hindawi journal article supplement (doi:10.1155/2021/8281506), 2021-10-16
Supplement: f1 [file 8281506.f1.zip]

| Ingredient  | Target |
|-------------|--------|
| Mairin      | PGR    |
| Jaranol     | NOS2   |
| Jaranol     | PTGS1  |
| Jaranol     | AR     |
| Jaranol     | SCN5A  |
| Jaranol     | PTGS1  |
| Jaranol     | ESR2   |
| Jaranol     | DPP4   |
| Jaranol     | HSP90  |
| Jaranol     | CDK2   |
| Jaranol     | CHEK1  |
| Jaranol     | PRSS1  |
| Jaranol     | NCOA2  |
| Jaranol     | CALM   |
| (3S,8S,9S,1 | PGR    |
| hederagen   | PGR    |
| hederagen   | NCOA2  |
| hederagen   | CHRM3  |
| hederagen   | CHRM1  |
| hederagen   | GABRA2 |
| hederagen   | GABRA3 |
| hederagen   | CHRM2  |
| hederagen   | ADRA1B |
| hederagen   | GABRA1 |
| hederagen   | GRIA2  |
| hederagen   | GABRA6 |
| hederagen   | GABRA5 |
| hederagen   | IGHG1  |
| hederagen   | ADH1B  |
| hederagen   | ADH1C  |
| hederagen   | LYZ    |
| hederagen   | N/A    |
| hederagen   | PTGS1  |
| hederagen   | SCN5A  |
| hederagen   | PTGS2  |
| hederagen   | RXRA   |
| hederagen   | PDE3A  |
| hederagen   | SLC6A2 |
| hederagen   | ?      |
| isorhamne   | NOS2   |
| isorhamne   | PTGS1  |
| isorhamne   | ESR1   |
| isorhamne   | AR     |
| isorhamne   | PPARG  |
| isorhamne   | PTGS2  |
| isorhamne   | PTPN1  |
| isorhamne   | ESR2   |
| isorhamne   | DPP4   |
| isorhamne   | MAPK14 |
| isorhamne   | GSK3B  |
| isorhamne   | HSP90  |
| isorhamne   | CDK2   |
| isorhamne   | PIK3CG |
| isorhamne   | PRKACA |
| isorhamne   | PRSS1  |
| isorhamne   | PIM1   |
| isorhamne   | CCNA2  |

isorhamne NCOA2  
isorhamne CALM  
isorhamne PYGM  
isorhamne PPARD  
isorhamne CHEK1  
isorhamne AKR  
isorhamne NCOA1  
isorhamne F7  
isorhamne N/A  
isorhamne NOS3  
isorhamne ACHE  
isorhamne GABRA1  
isorhamne MAOB  
isorhamne GRIA2  
isorhamne ?  
isorhamne RELA  
isorhamne XDH  
isorhamne NCF1  
isorhamne OLR1  
3,9-di-O-rNOS2  
3,9-di-O-rPTGS1  
3,9-di-O-rCHRM3  
3,9-di-O-rN/A  
3,9-di-O-rCHRM1  
3,9-di-O-rESR1  
3,9-di-O-rADRB1  
3,9-di-O-rSCN5A  
3,9-di-O-rPTGS2  
3,9-di-O-rNOS3  
3,9-di-O-rHTR3A  
3,9-di-O-rADRA2C  
3,9-di-O-rRXRA  
3,9-di-O-rACHE  
3,9-di-O-rPDE3A  
3,9-di-O-rADRA1B  
3,9-di-O-rADRB2  
3,9-di-O-rADRA1D  
3,9-di-O-rOPRM1  
3,9-di-O-rGABRA1  
3,9-di-O-rPRSS1  
3,9-di-O-rNCOA2  
3,9-di-O-rCALM  
5'-hydroxyN/A  
7-O-methNOS2  
7-O-methPTGS1  
7-O-methDRD1  
7-O-methCHRM3  
7-O-methN/A  
7-O-methKCNH2  
7-O-methCHRM1  
7-O-methESR1  
7-O-methAR  
7-O-methADRB1  
7-O-methSCN5A  
7-O-methPPARG  
7-O-methF10?  
7-O-methCHRM5  
7-O-methPTGS2

7-O-meth NOS3  
7-O-meth ADRA2C  
7-O-meth CHRM4  
7-O-meth RXRA  
7-O-meth OPRD1  
7-O-meth PDE3A  
7-O-meth HTR2A  
7-O-meth ADRA1A  
7-O-meth CHRM2  
7-O-meth ADRA1B  
7-O-meth SLC6A3  
7-O-meth ADRB2  
7-O-meth ADRA1D  
7-O-meth SLC6A4  
7-O-meth ESR2  
7-O-meth GABRA1  
7-O-meth DPP4  
7-O-meth MAPK14  
7-O-meth GSK3B  
7-O-meth HSP90  
7-O-meth CDK2  
7-O-meth CHEK1  
7-O-meth PRKACA  
7-O-meth RXRA  
7-O-meth PRSS1  
7-O-meth PIM1  
7-O-meth CCNA2  
7-O-meth NCOA2  
7-O-meth KCNMA1  
7-O-meth CALM  
9,10-dime PTGS2  
9,10-dime TOP2A  
9,10-dime NCOA2  
(6aR,11aR) NOS2  
(6aR,11aR) PTGS1  
(6aR,11aR) CHRM3  
(6aR,11aR) N/A  
(6aR,11aR) CHRM1  
(6aR,11aR) ESR1  
(6aR,11aR) SCN5A  
(6aR,11aR) PTGS2  
(6aR,11aR) HTR3A  
(6aR,11aR) RXRA  
(6aR,11aR) ACHE  
(6aR,11aR) ADRA1B  
(6aR,11aR) ADRB2  
(6aR,11aR) ADRA1D  
(6aR,11aR) GABRA1  
(6aR,11aR) HSP90  
(6aR,11aR) CHRNA7  
(6aR,11aR) PRSS1  
(6aR,11aR) NCOA2  
(6aR,11aR) NCOA1  
(6aR,11aR) CALM  
(6aR,11aR) CHRM4  
Bifendate PTGS2  
Bifendate KDR  
Bifendate MET

Bifendate HSP90  
Bifendate KCNMA1  
Bifendate PTGS1  
Bifendate TOP2A  
formononeNOS2  
formononePTGS1  
formononeCHRM1  
formononeESR1  
formononeAR  
formononePPARG  
formononePTGS2  
formononeRXRA  
formononePDE3A  
formononeADRA1A  
formononeSLC6A3  
formononeADRB2  
formononeSLC6A4  
formononeESR2  
formononeDPP4  
formononeMAPK14  
formononeGSK3B  
formononeHSP90  
formononeCDK2  
formononeMAOB  
formononeCHEK1  
formononePRKACA  
formononePRSS1  
formononePIM1  
formononeCCNA2  
formononeCALM  
formononePRKAR1A  
formononeN/A  
formononeNOS3  
formononeACHE  
formononeN/A  
formononeJUN  
formononePPARG  
formononeIL4  
formononeSIRT1  
formononeATP5F1B  
formononeMT-ND6  
formononeHSD3B2  
formononeHSD3B1  
isoflavanorN/A  
Calycosin NOS2  
Calycosin PTGS1  
Calycosin ESR1  
Calycosin AR  
Calycosin PPARG  
Calycosin PTGS2  
Calycosin RXRA  
Calycosin PDE3A  
Calycosin ESR2  
Calycosin DPP4  
Calycosin MAPK14  
Calycosin GSK3B  
Calycosin HSP90  
Calycosin CDK2

Calycosin CHEK1  
Calycosin PRKACA  
Calycosin PRSS1  
Calycosin PIM1  
Calycosin CCNA2  
Calycosin NCOA2  
Calycosin CALM  
Calycosin ADRB2  
kaempferoNOS2  
kaempferoPTGS1  
kaempferoAR  
kaempferoPPARG  
kaempferoPTGS2  
kaempferoHSP90  
kaempferoPIK3CG  
kaempferoPRKACA  
kaempferoNCOA2  
kaempferoDPP4  
kaempferoPRSS1  
kaempferoPGR  
kaempferoN/A  
kaempferoCHRM1  
kaempferoNOS3  
kaempferoGABRA2  
kaempferoACHE  
kaempferoSLC6A2  
kaempferoCHRM2  
kaempferoADRA1B  
kaempferoGABRA1  
kaempferoTOP2A  
kaempferoF7  
kaempferoCALM  
kaempferoRELA  
kaempferoIKKBK  
kaempferoAKT1  
kaempferoBCL2  
kaempferoBAX  
kaempferoTNF  
kaempferoJUN  
kaempferoAHSA1  
kaempferoCASP3  
kaempferoMAPK8  
kaempferoXDH  
kaempferoMMP1  
kaempferoSTAT1  
kaempferoCDK1  
kaempferoPPARG  
kaempferoHMOX1  
kaempferoCYP3A4  
kaempferoCYP1A2  
kaempferoCYP1A1  
kaempferoICAM1  
kaempferoSELE  
kaempferoVCAM1  
kaempferoNR1I2  
kaempferoCYP1B1  
kaempferoALOX5  
kaempferoHAS2

kaempfero GSTP1  
kaempfero AHR  
kaempfero PSMD3  
kaempfero SLC2A4  
kaempfero NR1I3  
kaempfero INSR  
kaempfero DIO1  
kaempfero PPP3CA  
kaempfero N/A  
kaempfero GSTM1  
kaempfero GSTM2  
kaempfero AKR1C3  
kaempfero N/A  
FA CDK2  
FA N/A  
FA GSK3B  
(3R)-3-(2- N/A  
isomucron TOP2A  
1,7-Dihydr PTGS2  
1,7-Dihydr RXRA  
1,7-Dihydr HSP90  
1,7-Dihydr PRSS1  
quercetin PTGS1  
quercetin AR  
quercetin PPARG  
quercetin PTGS2  
quercetin HSP90  
quercetin PIK3CG  
quercetin NCOA2  
quercetin DPP4  
quercetin AKR  
quercetin PRSS1  
quercetin TOP2A  
quercetin N/A  
quercetin KCNH2  
quercetin SCN5A  
quercetin F10?  
quercetin ADRB2  
quercetin MMP3  
quercetin PRKACA  
quercetin F7  
quercetin NOS3  
quercetin RXRA  
quercetin ACHE  
quercetin GABRA1  
quercetin MAOB  
quercetin RELA  
quercetin EGFR  
quercetin AKT1  
quercetin VEGFA  
quercetin CCND1  
quercetin BCL2  
quercetin BCL2L1  
quercetin FOS  
quercetin CDKN1A  
quercetin EIF6  
quercetin BAX  
quercetin CASP9

|           |       |
|-----------|-------|
| quercetin | PLAU  |
| quercetin | MMP2  |
| quercetin | MMP9  |
| quercetin | MAPK1 |
| quercetin | IL10  |
| quercetin | EGF   |
| quercetin | RB1   |
| quercetin | TNF   |
| quercetin | JUN   |
| quercetin | IL6   |
| quercetin | N/A   |
