# Supplementary material for: Network Pharmacology-Based Strategy to Investigate Pharmacological Mechanisms of the Drug Pair Astragalus-Angelica for Treatment of Male Infertility
Source: Hindawi journal article supplement (doi:10.1155/2021/8281506), 2021-10-16
Supplement: f1 [file 8281506.f1.zip]

| Ingredient | Target  |
|------------|---------|
| Dimethyl   | PSCN10A |
| Dimethyl   | PACHE   |
| Dimethyl   | PBCHE   |
| Dimethyl   | PCOLQ   |
| Dimethyl   | PSCN1A  |
| Dimethyl   | PGABRB1 |
| Dimethyl   | PGLRA2  |
| Dimethyl   | PGLRA3  |
| Dimethyl   | PGLRB   |
| Dimethyl   | PDBH    |
| Dimethyl   | PALDH2  |
| Dimethyl   | PGLRA1  |
| Beta-Myrc  | KCND1   |
| Beta-Myrc  | KCNA3   |
| Beta-Myrc  | PRKAB1  |
| Beta-Myrc  | ADH1A   |
| Beta-Myrc  | KCNA10  |
| Beta-Myrc  | GAMT    |
| Beta-Myrc  | KCNC3   |
| Beta-Myrc  | KCNA1   |
| Beta-Myrc  | KCNA2   |
| Beta-Myrc  | TPO     |
| Beta-Myrc  | CAT     |
| Beta-Myrc  | KCNB1   |
| Beta-Myrc  | ADH1B   |
| Beta-Myrc  | DLG4    |
| Beta-Myrc  | KCNC2   |
| Beta-Myrc  | KCNC1   |
| Beta-Myrc  | ADH1C   |
| Beta-Myrc  | KCNB2   |
| Beta-Myrc  | KCNA5   |
| Beta-Myrc  | RNASE1  |
| Beta-Myrc  | KCND2   |
| Beta-Myrc  | ALDH2   |
| Beta-Myrc  | KCNA4   |
| Beta-Myrc  | KCNA7   |
| Beta-Myrc  | KCNA6   |
| Beta-Myrc  | KCND3   |
| Beta-Myrc  | GUCY1B3 |
| Beta-Myrc  | GATM    |
| Beta-Myrc  | KCNK4   |
| Beta-Myrc  | IYD     |
| Beta-Myrc  | KCNQ1   |
| Ethanol    | CACNB1  |
| Ethanol    | GRIA4   |
| Ethanol    | GABRA2  |
| Ethanol    | CACNG2  |
| Ethanol    | GABRD   |
| Ethanol    | CHRNA4  |
| Ethanol    | CHRNB3  |
| Ethanol    | GABRB1  |
| Ethanol    | GRIA1   |
| Ethanol    | GLRA2   |
| Ethanol    | KCNJ3   |
| Ethanol    | GABRG3  |
| Ethanol    | VCAM1   |
| Ethanol    | CHRNA7  |

|            |          |
|------------|----------|
| Ethanol    | KCNJ6    |
| Ethanol    | GABRE    |
| Ethanol    | GABRA3   |
| Ethanol    | SLC29A1  |
| Ethanol    | CACNA1S  |
| Ethanol    | GABRG1   |
| Ethanol    | GABRP    |
| Ethanol    | CHRNA10  |
| Ethanol    | GRIA2    |
| Ethanol    | GABRA4   |
| Ethanol    | CHRNA3   |
| Ethanol    | GABRB2   |
| Ethanol    | CACNA1C  |
| Ethanol    | CHRNB2   |
| Ethanol    | CACNA1D  |
| Ethanol    | HTR3D    |
| Ethanol    | GABRQ    |
| Ethanol    | CHRNA2   |
| Ethanol    | CHRNA6   |
| Ethanol    | GABRB3   |
| Ethanol    | KCNJ5    |
| Ethanol    | GRIN3A   |
| Ethanol    | HTR3B    |
| Ethanol    | GRIA3    |
| Ethanol    | GABRA5   |
| Ethanol    | SLC29A2  |
| Ethanol    | HTR3E    |
| Ethanol    | GABRA6   |
| Ethanol    | HTR3A    |
| Ethanol    | GABRA1   |
| Ethanol    | CHRNA9   |
| Ethanol    | CHRFAM7A |
| Ethanol    | CHRNA5   |
| Ethanol    | CHRNB4   |
| Ethanol    | KCNJ9    |
| Ethanol    | HTR3C    |
| Ethanol    | GLRA1    |
| Ethanol    | CACNG1   |
| Ethanol    | ADAM8    |
| Ethanol    | SLC28A3  |
| Ethanol    | ADRA1B   |
| Ethanol    | FOXL2    |
| Ethanol    | DMTN     |
| Ethanol    | KCNMA1   |
| Tetradecar | KCND1    |
| Tetradecar | GAMT     |
| Tetradecar | CAT      |
| Tetradecar | KCNC1    |
| Tetradecar | KCND2    |
| Tetradecar | KCND3    |
| Tetradecar | KCNQ1    |
| Tetradecar | KCNA3    |
| Tetradecar | KCNC3    |
| Tetradecar | KCNB1    |
| Tetradecar | ADH1C    |
| Tetradecar | ALDH2    |
| Tetradecar | GUCY1B3  |
| Tetradecar | PRKAB1   |

Tetradecar KCNA1  
Tetradecar ADH1B  
Tetradecar KCNB2  
Tetradecar KCNA4  
Tetradecar GATM  
Tetradecar ADH1A  
Tetradecar KCNA2  
Tetradecar DLG4  
Tetradecar KCNA5  
Tetradecar KCNA7  
Tetradecar KCNK4  
Tetradecar KCNA10  
Tetradecar TPO  
Tetradecar KCNC2  
Tetradecar RNASE1  
Tetradecar KCNA6  
Tetradecar IYD  
Carvacrol GABRA2  
Carvacrol TNF  
Carvacrol GABRP  
Carvacrol GABRQ  
Carvacrol PDE4B  
Carvacrol COLQ  
Carvacrol SLC6A4  
Carvacrol DRD3  
Carvacrol GABRD  
Carvacrol GABRE  
Carvacrol GABRA4  
Carvacrol GABRB3  
Carvacrol BCHE  
Carvacrol LTA  
Carvacrol DRD4  
Carvacrol ALOX5  
Carvacrol PDE3A  
Carvacrol SCN2A  
Carvacrol GABRB2  
Carvacrol GABRA5  
Carvacrol GABRG2  
Carvacrol RXRA  
Carvacrol HTR7  
Carvacrol DRD5  
Carvacrol GABRB1  
Carvacrol GABRA3  
Carvacrol ACHE  
Carvacrol GABRA6  
Carvacrol PDE3B  
Carvacrol SLC6A3  
Carvacrol HTR1A  
Carvacrol DRD1  
Carvacrol GABRG3  
Carvacrol GABRG1  
Carvacrol SCN4A  
Carvacrol GABRA1  
Carvacrol PDE4D  
Carvacrol DRD2  
Carvacrol DBH  
Carvacrol SLC6A2  
2',4'-Dihydroxy PTGS1

2',4'-Dihydroxyphenylalanine PTGS2  
 Uridine TYMS  
 Uridine POLA1  
 Uridine NT5C2  
 Uridine PNP  
 Uridine ADK  
 Uridine POLB  
 Uridine IMPDH1  
 Uridine TERT  
 Uridine ENPP1  
 Beta-Elementary KCND1  
 Beta-Elementary GAMT  
 Beta-Elementary CAT  
 Beta-Elementary KCNC1  
 Beta-Elementary KCND2  
 Beta-Elementary KCND3  
 Beta-Elementary KCNQ1  
 Beta-Elementary KCNA3  
 Beta-Elementary KCNC3  
 Beta-Elementary KCNB1  
 Beta-Elementary ADH1C  
 Beta-Elementary ALDH2  
 Beta-Elementary GUCY1B3  
 Beta-Elementary PRKAB1  
 Beta-Elementary KCNA1  
 Beta-Elementary ADH1B  
 Beta-Elementary KCNB2  
 Beta-Elementary KCNA4  
 Beta-Elementary GATM  
 Beta-Elementary ADH1A  
 Beta-Elementary KCNA2  
 Beta-Elementary DLG4  
 Beta-Elementary KCNA5  
 Beta-Elementary KCNA7  
 Beta-Elementary KCNK4  
 Beta-Elementary KCNA10  
 Beta-Elementary TPO  
 Beta-Elementary KCNC2  
 Beta-Elementary RNASE1  
 Beta-Elementary KCNA6  
 Beta-Elementary IYD  
 Azelaic Acid AKR1D1  
 Azelaic Acid ABAT  
 Azelaic Acid COX5B  
 Azelaic Acid SCN7A  
 Azelaic Acid COX5A  
 Azelaic Acid COX4I1  
 Azelaic Acid SCN4A  
 Azelaic Acid CES1  
 Azelaic Acid COX2  
 Azelaic Acid SUCLG2  
 Azelaic Acid SLC25A10  
 Azelaic Acid SUCNR1  
 Azelaic Acid OXCT1  
 Azelaic Acid SDHA  
 Azelaic Acid DCT  
 Azelaic Acid JMJD6  
 Azelaic Acid HSD17B11

Azelaic AciP4HB  
Azelaic AciGRIN3B  
Azelaic AciCACNA1B  
Azelaic AciGRIN3A  
Azelaic AciGRIN1  
Azelaic AciTYR  
Azelaic AciSCN1A  
Azelaic AciCOX7C  
Azelaic AciSCN5A  
Azelaic AciCOX3  
Azelaic AciHDAC9  
Azelaic AciSCN4B  
Azelaic AciACADSB  
Azelaic AciOGDH  
Azelaic AciSLC13A2  
Azelaic AciP3H3  
Azelaic AciSLC13A3  
Azelaic AciPLOD3  
Azelaic AciP4HA2  
Azelaic AciAKR1C3  
Azelaic AciSLC13A4  
Azelaic AciTYRP1  
Azelaic AciCACNA2D1  
Azelaic AciCACNA2D2  
Azelaic AciGRIN2C  
Azelaic AciSLC7A1  
Azelaic AciSRD5A2  
Azelaic AciESRRG  
Azelaic AciCOX1  
Azelaic AciSCN10A  
Azelaic AciAR  
Azelaic AciPLA2G1B  
Azelaic AciADH1C  
Azelaic AciSCN8A  
Azelaic AciHDAC2  
Azelaic AciSLC13A1  
Azelaic AciOXCT2  
Azelaic AciASPH  
Azelaic AciP4HA1  
Azelaic AciSUCLA2  
Azelaic AciCRTAP  
Azelaic AciSDHAF2  
Azelaic AciHIF1AN  
Azelaic AciPLAT  
Azelaic AciGRIN2A  
Azelaic AciGRIN2B  
Azelaic AciSLC7A4  
Azelaic AciSCN11A  
Azelaic AciSCN3B  
Azelaic AciSCN3A  
Azelaic AciALDH5A1  
Azelaic AciCOX7A1  
Azelaic AciCOX6A2  
Azelaic AciCOX6B1  
Azelaic AciCOX7B  
Azelaic AciCOX8A  
Azelaic AciSUCLG1  
Azelaic AciTMLHE

Azelaic AciBBOX1  
Azelaic AciSDHC  
Azelaic AciSDHD  
Azelaic AciSLIT2  
Azelaic AciSLC1A3  
Azelaic AciUROS  
Azelaic AciSLC7A2  
Azelaic AciTOP1  
Azelaic AciSLC7A3  
Azelaic AciGRIN2D  
Azelaic AciSCN2B  
Azelaic AciCOX6C  
Azelaic AciAKR1C2  
Azelaic AciSCN2A  
Azelaic AciFECH  
Azelaic AciSCN9A  
Azelaic AciFABP6  
Azelaic AciSCN1B  
Azelaic AciNR1H4  
Azelaic AciHSD17B6  
Azelaic AciPLOD1  
Azelaic AciSDHB  
Azelaic AciP3H2  
Azelaic AciP3H1  
Azelaic AciACO2  
Azelaic AciSALL1  
Azelaic AciSLC13A5  
Azelaic AciCACNA1A  
Azelaic AciPLG  
Azelaic AciKARS  
Azelaic AciADORA1  
2-Methyl-Dodecane-5-One  
2-Methyl- SCN11A  
2-Methyl- SCN3A  
2-Methyl- ALDH5A1  
2-Methyl- SCN4A  
2-Methyl- SCN1B  
2-Methyl- SCN2B  
2-Methyl- SCN7A  
2-Methyl- SCN2A  
2-Methyl- SCN4B  
2-Methyl- OGDH  
2-Methyl- ABAT  
2-Methyl- SCN5A  
2-Methyl- HDAC9  
2-Methyl- SRD5A2  
2-Methyl- HDAC2  
2-Methyl- SCN1A  
2-Methyl- SCN10A  
2-Methyl- TYR  
2-Methyl- ACADSB  
2-Methyl- SCN3B  
2-Methyl- AKR1D1  
2-Methyl- SCN9A  
2-Methyl- SCN8A  
24,24-Dim ESR1  
24,24-Dim SNW1  
24,24-Dim PGR

24,24-Dim SRD5A1  
24,24-Dim VDR  
24,24-Dim AR  
24,24-Dim CYP27B1  
24,24-Dim NR3C1  
24,24-Dim GC  
24,24-Dim ANXA1  
Dimethyl ANPR1  
Dimethyl AESRRG  
Dimethyl ACOX1  
Dimethyl ASCN10A  
Dimethyl ACOX3  
Dimethyl AHDAC9  
Dimethyl ASCN4A  
Dimethyl ACES1  
Dimethyl ASCN1B  
Dimethyl ANR1H4  
Dimethyl ASCN11A  
Dimethyl ASCN3B  
Dimethyl ASCN3A  
Dimethyl AAKR1D1  
Dimethyl AAR  
Dimethyl APLA2G1B  
Dimethyl ASCN4B  
Dimethyl ASRD5A2  
Dimethyl ACOX2  
Dimethyl ASCN2B  
Dimethyl ACOX6C  
Dimethyl AAKR1C2  
Dimethyl AALDH5A1  
Dimethyl ACOX7A1  
Dimethyl ACOX6A2  
Dimethyl AADH1C  
Dimethyl AACADSB  
Dimethyl AOGDH  
Dimethyl AABAT  
Dimethyl ACOX5B  
Dimethyl ASCN7A  
Dimethyl ASCN2A  
Dimethyl AFECH  
Dimethyl ATYR  
Dimethyl ACOX6B1  
Dimethyl ASCN8A  
Dimethyl AHDAC2  
Dimethyl ASCN1A  
Dimethyl ACOX7C  
Dimethyl ASCN5A  
Dimethyl ACOX5A  
Dimethyl ACOX4I1  
Dimethyl ASCN9A  
Dimethyl AFABP6  
Dimethyl ACOX7B  
Dimethyl ACOX8A  
Guanosine POLA1  
Guanosine ADORA2B  
Guanosine ADORA2A  
Guanosine ADORA3  
Guanosine POLB

Guanosine ADORA1  
Guanosine DNMT1  
Guanosine PNP  
DodecenoiRXRB  
DodecenoiNR0B1  
DodecenoiCKM  
DodecenoiPPARD  
DodecenoiPTGS2  
DodecenoiCKB  
DodecenoiAPOA2  
DodecenoiIL13  
DodecenoiCOL27A1  
DodecenoiSLC8A1  
DodecenoiTRPV1  
DodecenoiRARB  
DodecenoiSLC6A8  
DodecenoiCKMT1A  
DodecenoiGPRC5A  
DodecenoiALDH3A1  
DodecenoiGATM  
DodecenoiSERPINB7  
DodecenoiGAMT  
DodecenoiRARG  
DodecenoiRXRG  
DodecenoiPTGS1  
DodecenoiELOVL4  
DodecenoiRXRA  
DodecenoiIL1B  
DodecenoiSC5D  
DodecenoiCKMT1B  
DodecenoiPPARG  
DodecenoiFADS2  
DodecenoiACSL4  
DodecenoiALDH1A1  
DodecenoiALDH1A2  
DodecenoiTNF  
DodecenoiSLC16A12  
DodecenoiRARRES1  
DodecenoiFFAR1  
DodecenoiFADS1  
DodecenoiCKMT2  
DodecenoiRARA  
DodecenoiACSL3  
DodecenoiSLC9A1  
DodecenoiLPCAT1  
Dimethyl- $\text{-tSCN11A}$   
Dimethyl- $\text{-tSCN1A}$   
Dimethyl- $\text{-tSCN3A}$   
Dimethyl- $\text{-tSCN7A}$   
Dimethyl- $\text{-tSLC13A3}$   
Dimethyl- $\text{-tBBOX1}$   
Dimethyl- $\text{-tOXCT1}$   
Dimethyl- $\text{-tSDHC}$   
Dimethyl- $\text{-tP3H2}$   
Dimethyl- $\text{-tHDAC2}$   
Dimethyl- $\text{-tCRTAP}$   
Dimethyl- $\text{-tSDHAF2}$   
Dimethyl- $\text{-tHIF1AN}$



Dimethyl- $\{$ SCN2B  
Dimethyl- $\{$ SCN3B  
Dimethyl- $\{$ SLC25A10  
Dimethyl- $\{$ PLOD1  
Dimethyl- $\{$ AKR1D1  
Dimethyl- $\{$ SDHB  
Dimethyl- $\{$ SCN4A  
Dimethyl- $\{$ SRD5A2  
Dimethyl- $\{$ SDHA  
Dimethyl- $\{$ SDHD  
Dimethyl- $\{$ SLIT2  
Dimethyl- $\{$ SLC1A3  
Dimethyl- $\{$ UROS  
Dimethyl- $\{$ SUCLG2  
Dimethyl- $\{$ SLC13A1  
Dimethyl- $\{$ P3H3  
Dimethyl- $\{$ SCN5A  
Dimethyl- $\{$ ALDH5A1  
Dimethyl- $\{$ HDAC9  
Dimethyl- $\{$ SCN4B  
Dimethyl- $\{$ ACADSB  
Dimethyl- $\{$ OGDH  
Dimethyl- $\{$ P3H1  
Dimethyl- $\{$ ACO2  
Dimethyl- $\{$ SALL1  
Dimethyl- $\{$ SLC13A5  
Dimethyl- $\{$ SLC13A2  
Dimethyl- $\{$ SUCLG1  
Dimethyl- $\{$ OXCT2  
Dimethyl- $\{$ SCN10A  
Dimethyl- $\{$ SCN2A  
Dimethyl- $\{$ TYR  
Dimethyl- $\{$ PLOD3  
Dimethyl- $\{$ SCN8A  
Dimethyl- $\{$ P4HA2  
Dimethyl- $\{$ DCT  
Dimethyl- $\{$ JMJD6  
Dimethyl- $\{$ HSD17B11  
Dimethyl- $\{$ P4HB  
Dimethyl- $\{$ ABAT  
Dimethyl- $\{$ HSD17B6  
Dimethyl- $\{$ TMLHE  
Dimethyl- $\{$ SUCNR1  
Dimethyl- $\{$ ASPH  
Dimethyl- $\{$ SCN9A  
Dimethyl- $\{$ P4HA1  
Dimethyl- $\{$ SCN1B  
Dimethyl- $\{$ SUCLA2  
Dimethyl- $\{$ AKR1C3  
Dimethyl- $\{$ SLC13A4  
Dimethyl- $\{$ TYRP1  
4-EthylrescGABRA2  
4-EthylrescTNF  
4-EthylrescGABRP  
4-EthylrescGABRQ  
4-EthylrescPDE4B  
4-EthylrescCOLQ  
4-EthylrescSLC6A4

4-EthylrescDRD3  
4-EthylrescGABRD  
4-EthylrescGABRE  
4-EthylrescGABRA4  
4-EthylrescGABRB3  
4-EthylrescBCHE  
4-EthylrescLTA  
4-EthylrescDRD4  
4-EthylrescDRD5  
4-EthylrescPDE3A  
4-EthylrescSCN2A  
4-EthylrescGABRB2  
4-EthylrescGABRA5  
4-EthylrescGABRG2  
4-EthylrescRXRA  
4-EthylrescHTR7  
4-EthylrescDRD1  
4-EthylrescGABRB1  
4-EthylrescGABRA3  
4-EthylrescACHE  
4-EthylrescGABRA6  
4-EthylrescPDE3B  
4-EthylrescSLC6A3  
4-EthylrescHTR1A  
4-EthylrescSLC6A2  
4-EthylrescGABRG3  
4-EthylrescGABRG1  
4-EthylrescSCN4A  
4-EthylrescGABRA1  
4-EthylrescPDE4D  
4-EthylrescDRD2  
4-EthylrescDBH  
Dimethyl SNPR1  
Dimethyl SESRRG  
Dimethyl SCOX1  
Dimethyl SSCN10A  
Dimethyl SCOX3  
Dimethyl SHDAC9  
Dimethyl SSCN4A  
Dimethyl SCES1  
Dimethyl SSCN1B  
Dimethyl SNR1H4  
Dimethyl SSCN11A  
Dimethyl SSCN3B  
Dimethyl SSCN3A  
Dimethyl SAKR1D1  
Dimethyl SAR  
Dimethyl SPLA2G1B  
Dimethyl SSCN4B  
Dimethyl SSRD5A2  
Dimethyl SCOX2  
Dimethyl SSCN2B  
Dimethyl SCOX6C  
Dimethyl SAKR1C2  
Dimethyl SALDH5A1  
Dimethyl SCOX7A1  
Dimethyl SCOX6A2  
Dimethyl SADH1C

Dimethyl SACADSB  
Dimethyl SOGDH  
Dimethyl SABAT  
Dimethyl SCOX5B  
Dimethyl SSCN7A  
Dimethyl SSCN2A  
Dimethyl SFECH  
Dimethyl STYR  
Dimethyl SCOX6B1  
Dimethyl SSCN8A  
Dimethyl SHDAC2  
Dimethyl SSCN1A  
Dimethyl SCOX7C  
Dimethyl SSCN5A  
Dimethyl SCOX5A  
Dimethyl SCOX4I1  
Dimethyl SSCN9A  
Dimethyl SFABP6  
Dimethyl SCOX7B  
Dimethyl SCOX8A  
PhenylacetPLAT  
PhenylacetCFTR  
PhenylacetHCAR3  
PhenylacetIL13  
PhenylacetCXCR1  
PhenylacetTHBD  
PhenylacetPTGS1  
PhenylacetNNMT  
PhenylacetC1QTNF3  
PhenylacetPPARG  
PhenylacetPTGS2  
PhenylacetAPOA2  
PhenylacetKCNE2  
PhenylacetBCL2  
PhenylacetHCAR2  
PhenylacetTCAF1  
PhenylacetANXA1  
PhenylacetFABP2  
PhenylacetQPR1  
PhenylacetIL1B  
PhenylacetSERPINB7  
1-TridecerKCND1  
1-TridecerGAMT  
1-TridecerCAT  
1-TridecerKCNC1  
1-TridecerKCND2  
1-TridecerKCND3  
1-TridecerKCNQ1  
1-TridecerKCNA3  
1-TridecerKCNC3  
1-TridecerKCNB1  
1-TridecerADH1C  
1-TridecerALDH2  
1-TridecerGUCY1B3  
1-TridecerPRKAB1  
1-TridecerKCNA1  
1-TridecerADH1B  
1-TridecerKCNB2

1-TridecenKCNA4  
1-TridecenGATM  
1-TridecenADH1A  
1-TridecenKCNA2  
1-TridecenDLG4  
1-TridecenKCNA5  
1-TridecenKCNA7  
1-TridecenKCNK4  
1-TridecenKCNA10  
1-TridecenTPO  
1-TridecenKCNC2  
1-TridecenRNASE1  
1-TridecenKCNA6  
1-TridecenIYD  
Sebiferic ARXRB  
Sebiferic ANR0B1  
Sebiferic ACKM  
Sebiferic APPARD  
Sebiferic APTGS2  
Sebiferic ACKB  
Sebiferic AAPOA2  
Sebiferic AIL13  
Sebiferic A COL27A1  
Sebiferic ASCN1A  
Sebiferic ACOX7C  
Sebiferic ASCN7A  
Sebiferic ASCN2A  
Sebiferic AFECH  
Sebiferic ACOX6A2  
Sebiferic AADH1C  
Sebiferic AACADSB  
Sebiferic AOGDH  
Sebiferic ASLC8A1  
Sebiferic ATRPV1  
Sebiferic ARARB  
Sebiferic ASLC6A8  
Sebiferic ACKMT1A  
Sebiferic AGPRC5A  
Sebiferic AALDH3A1  
Sebiferic AGATM  
Sebiferic ASERPINB7  
Sebiferic AESRRG  
Sebiferic ACOX1  
Sebiferic ASCN5A  
Sebiferic ACOX5A  
Sebiferic APLG  
Sebiferic ATYR  
Sebiferic ACOX6B1  
Sebiferic ASCN8A  
Sebiferic AHDAC2  
Sebiferic AGAMT  
Sebiferic ARARG  
Sebiferic ARXRG  
Sebiferic APTGS1  
Sebiferic AELOVL4  
Sebiferic ARXRA  
Sebiferic AIL1B  
Sebiferic ASC5D

Sebiferic ASCN11A  
Sebiferic ASCN3B  
Sebiferic AF12  
Sebiferic ASCN10A  
Sebiferic ACOX3  
Sebiferic ACOX4I1  
Sebiferic ASCN9A  
Sebiferic AFABP6  
Sebiferic ACOX7B  
Sebiferic ACOX8A  
Sebiferic ACKMT1B  
Sebiferic APPARG  
Sebiferic AFADS2  
Sebiferic AACSL4  
Sebiferic AALDH1A1  
Sebiferic AALDH1A2  
Sebiferic ATNF  
Sebiferic ASLC16A12  
Sebiferic ASCN2B  
Sebiferic ACOX6C  
Sebiferic ASCN3A  
Sebiferic AAKR1D1  
Sebiferic AAR  
Sebiferic AHDAC9  
Sebiferic ASCN4A  
Sebiferic ACES1  
Sebiferic ASCN1B  
Sebiferic ANR1H4  
Sebiferic ARARRES1  
Sebiferic AFFAR1  
Sebiferic AFADS1  
Sebiferic ACKMT2  
Sebiferic ARARA  
Sebiferic AACSL3  
Sebiferic ASLC9A1  
Sebiferic ALPCAT1  
Sebiferic AABAT  
Sebiferic ACOX5B  
Sebiferic AAKR1C2  
Sebiferic AALDH5A1  
Sebiferic ACOX7A1  
Sebiferic APLA2G1B  
Sebiferic ASCN4B  
Sebiferic ASRD5A2  
Sebiferic ACOX2  
Alpha-Ter $\uparrow$ ESR1  
Alpha-Ter $\uparrow$ ANXA1  
Alpha-Ter $\uparrow$ PGR  
Alpha-Ter $\uparrow$ VDR  
Alpha-Ter $\uparrow$ WNT4  
Alpha-Ter $\uparrow$ AR  
Alpha-Ter $\uparrow$ NR3C1  
Scopoletin COMT  
Angelicin SOAT1  
Angelicin ABCC2  
Angelicin ACSS2  
Angelicin TNK2  
Angelicin ABCC9

Angelicin ASS1  
Angelicin APAF1  
Angelicin ABCG1  
Angelicin GC  
Angelicin ANPEP  
Angelicin AKT1  
Angelicin ACVRL1  
Angelicin ASNS  
Angelicin ACSS1  
Angelicin ACVR1B  
Angelicin ABCC8  
Angelicin ARAF  
Angelicin SNW1  
Angelicin NPC1L1  
Angelicin ACVR1  
Angelicin ADCY1  
Angelicin ABL2  
Angelicin ABL1  
Angelicin ACSL1  
Angelicin ALK  
Angelicin SLC25A4  
Angelicin AR  
Angelicin ESR1  
Angelicin ASNA1  
Angelicin NT5C2  
Angelicin ADRBK1  
Angelicin AFG3L2  
Angelicin ABCA1  
Angelicin ABCB11  
Angelicin VDR  
Angelicin NR3C1  
Angelicin PGR  
Angelicin ADRBK2  
Angelicin AMHR2  
Angelicin PRKAA1  
Angelicin CDK15  
Angelicin NAE1  
Angelicin ABCB1  
Angelicin CYP27B1  
Ethyl-P-MRXRB  
Ethyl-P-MRARA  
Ethyl-P-MRARG  
Ethyl-P-MRXRA  
Ethyl-P-MRARB  
Ethyl-P-MTNF  
Ethyl-P-MRXRG  
Ethyl-P-MCOL27A1  
Ethyl-P-MRBP1  
Decanoic /AKR1D1  
Decanoic /ABAT  
Decanoic /COX5B  
Decanoic /SCN7A  
Decanoic /COX5A  
Decanoic /COX4I1  
Decanoic /SCN4A  
Decanoic /CES1  
Decanoic /COX2  
Decanoic /SUCLG2

Decanoic /SLC25A10  
Decanoic /SUCNR1  
Decanoic /OXCT1  
Decanoic /SDHA  
Decanoic /DCT  
Decanoic /JMJD6  
Decanoic /HSD17B11  
Decanoic /P4HB  
Decanoic /GRIN3B  
Decanoic /CACNA1B  
Decanoic /GRIN3A  
Decanoic /GRIN1  
Decanoic /TYR  
Decanoic /SCN1A  
Decanoic /COX7C  
Decanoic /SCN5A  
Decanoic /COX3  
Decanoic /HDAC9  
Decanoic /SCN4B  
Decanoic /ACADSB  
Decanoic /OGDH  
Decanoic /SLC13A2  
Decanoic /P3H3  
Decanoic /SLC13A3  
Decanoic /PLOD3  
Decanoic /P4HA2  
Decanoic /AKR1C3  
Decanoic /SLC13A4  
Decanoic /TYRP1  
Decanoic /CACNA2D1  
Decanoic /CACNA2D2  
Decanoic /GRIN2C  
Decanoic /SLC7A1  
Decanoic /SRD5A2  
Decanoic /ESRRG  
Decanoic /COX1  
Decanoic /SCN10A  
Decanoic /AR  
Decanoic /PLA2G1B  
Decanoic /ADH1C  
Decanoic /SCN8A  
Decanoic /HDAC2  
Decanoic /SLC13A1  
Decanoic /OXCT2  
Decanoic /ASPH  
Decanoic /P4HA1  
Decanoic /SUCLA2  
Decanoic /CRTAP  
Decanoic /SDHAF2  
Decanoic /HIF1AN  
Decanoic /PLAT  
Decanoic /GRIN2A  
Decanoic /GRIN2B  
Decanoic /SLC7A4  
Decanoic /SCN11A  
Decanoic /SCN3B  
Decanoic /SCN3A  
Decanoic /ALDH5A1

Decanoic /COX7A1  
Decanoic /COX6A2  
Decanoic /COX6B1  
Decanoic /COX7B  
Decanoic /COX8A  
Decanoic /SUCLG1  
Decanoic /TMLHE  
Decanoic /BBOX1  
Decanoic /SDHC  
Decanoic /SDHD  
Decanoic /SLIT2  
Decanoic /SLC1A3  
Decanoic /UROS  
Decanoic /SLC7A2  
Decanoic /TOP1  
Decanoic /SLC7A3  
Decanoic /GRIN2D  
Decanoic /SCN2B  
Decanoic /COX6C  
Decanoic /AKR1C2  
Decanoic /SCN2A  
Decanoic /FECH  
Decanoic /SCN9A  
Decanoic /FABP6  
Decanoic /SCN1B  
Decanoic /NR1H4  
Decanoic /HSD17B6  
Decanoic /PLOD1  
Decanoic /SDHB  
Decanoic /P3H2  
Decanoic /P3H1  
Decanoic /ACO2  
Decanoic /SALL1  
Decanoic /SLC13A5  
Decanoic /CACNA1A  
Decanoic /PLG  
Decanoic /KARS  
Decanoic /ADORA1  
Dihydropir GABRA2  
Dihydropir TNF  
Dihydropir GABRP  
Dihydropir GABRQ  
Dihydropir PDE4B  
Dihydropir COLQ  
Dihydropir OPRK1  
Dihydropir SLC6A2  
Dihydropir GABRD  
Dihydropir GABRE  
Dihydropir GABRA4  
Dihydropir GABRB3  
Dihydropir BCHE  
Dihydropir LTA  
Dihydropir SLC6A4  
Dihydropir PDE3A  
Dihydropir SCN2A  
Dihydropir GABRB2  
Dihydropir GABRA5  
Dihydropir GABRG2



DihydropirRXRA  
DihydropirOPRM1  
DihydropirGABRB1  
DihydropirGABRA3  
DihydropirACHE  
DihydropirGABRA6  
DihydropirPDE3B  
DihydropirADRA1A  
DihydropirALOX5  
DihydropirGABRG3  
DihydropirGABRG1  
DihydropirSCN4A  
DihydropirGABRA1  
DihydropirPDE4D  
DihydropirOPRD1  
DihydropirHTR3A  
BicycloelerKCND1  
BicycloelerGAMT  
BicycloelerCAT  
BicycloelerKCNC1  
BicycloelerKCND2  
BicycloelerKCND3  
BicycloelerKCNQ1  
BicycloelerRDH13  
BicycloelerESR1  
BicycloelerRXRG  
BicycloelerRLBP1  
BicycloelerLRAT  
BicycloelerKCNA3  
BicycloelerKCNC3  
BicycloelerKCNB1  
BicycloelerADH1C  
BicycloelerALDH2  
BicycloelerGUCY1B3  
BicycloelerRDH11  
BicycloelerDHRS3  
BicycloelerRARG  
BicycloelerRDH12  
BicycloelerRDH14  
BicycloelerRXRA  
BicycloelerPRKAB1  
BicycloelerKCNA1  
BicycloelerADH1B  
BicycloelerKCNB2  
BicycloelerKCNA4  
BicycloelerGATM  
BicycloelerRXRB  
BicycloelerRDH5  
BicycloelerPGR  
BicycloelerDHRS4  
BicycloelerRARA  
BicycloelerALDH1A2  
BicycloelerADH1A  
BicycloelerKCNA2  
BicycloelerDLG4  
BicycloelerKCNA5  
BicycloelerKCNA7  
BicycloelerKCNK4

BicycloelerRBP3  
BicycloelerRARRES1  
BicycloelerRARB  
BicycloelerRBP1  
BicycloelerRDH8  
BicycloelerVDR  
BicycloelerKCNA10  
BicycloelerTPO  
BicycloelerKCNC2  
BicycloelerRNASE1  
BicycloelerKCNA6  
BicycloelerIYD  
BicycloelerRETSAT  
BicycloelerNR0B1  
BicycloelerALDH1A3  
BicycloelerALDH1A1  
BicycloelerGPRC5A  
AlloocimerKCND1  
AlloocimerGAMT  
AlloocimerCAT  
AlloocimerKCNC1  
AlloocimerKCND2  
AlloocimerKCND3  
AlloocimerKCNQ1  
AlloocimerKCNA3  
AlloocimerKCNC3  
AlloocimerKCNB1  
AlloocimerADH1C  
AlloocimerALDH2  
AlloocimerGUCY1B3  
AlloocimerPRKAB1  
AlloocimerKCNA1  
AlloocimerADH1B  
AlloocimerKCNB2  
AlloocimerKCNA4  
AlloocimerGATM  
AlloocimerADH1A  
AlloocimerKCNA2  
AlloocimerDLG4  
AlloocimerKCNA5  
AlloocimerKCNA7  
AlloocimerKCNK4  
AlloocimerKCNA10  
AlloocimerTPO  
AlloocimerKCNC2  
AlloocimerRNASE1  
AlloocimerKCNA6  
AlloocimerIYD  
1-Methyl-:HTR4  
1-Methyl-:NQO2  
1-Methyl-:GGCX  
1-Methyl-:OPRM1  
1-Methyl-:HTR1A  
1-Methyl-:AGTR1  
1-Methyl-:AVP  
1-Methyl-:WLS  
1-Methyl-:GABRA2  
1-Methyl-:HTR1B

1-Methyl-;F10  
1-Methyl-;AGTR2  
1-Methyl-;PTGS2  
1-Methyl-;VKORC1L1  
1-Methyl-;PAX2  
1-Methyl-;GPR27  
1-Methyl-;PROS1  
1-Methyl-;GABRA3  
1-Methyl-;VKORC1  
1-Methyl-;BGLAP  
1-Methyl-;HTR3A  
1-Methyl-;F2  
1-Methyl-;DAB2  
1-Methyl-;SERPINB7  
1-Methyl-;PROZ  
1-Methyl-;F7  
1-Methyl-;JUN  
1-Methyl-;PTGS1  
1-Methyl-;GABRA1  
1-Methyl-;AGT  
1-Methyl-;MGP  
1-Methyl-;ACTN2  
1-Methyl-;AVPR1A  
1-Methyl-;F9  
1-Methyl-;PROC  
1-Methyl-;AVPR2  
1-Methyl-;NQO1  
1-Methyl-;CBR4  
1-Methyl-;F3  
Limonene KCND1  
Limonene GAMT  
Limonene CAT  
Limonene KCNC1  
Limonene KCND2  
Limonene KCND3  
Limonene KCNQ1  
Limonene NR3C2  
Limonene KCNA3  
Limonene KCNC3  
Limonene KCNB1  
Limonene ADH1C  
Limonene ALDH2  
Limonene GUCY1B3  
Limonene CYP17A1  
Limonene PRKAB1  
Limonene KCNA1  
Limonene ADH1B  
Limonene KCNB2  
Limonene KCNA4  
Limonene GATM  
Limonene ESR1  
Limonene ADH1A  
Limonene KCNA2  
Limonene DLG4  
Limonene KCNA5  
Limonene KCNA7  
Limonene KCNK4  
Limonene PGR

Limonene KCNA10  
Limonene TPO  
Limonene KCNC2  
Limonene RNASE1  
Limonene KCNA6  
Limonene IYD  
Limonene OPRK1  
Beta-Bisab KCND1  
Beta-Bisab GAMT  
Beta-Bisab CAT  
Beta-Bisab KCNC1  
Beta-Bisab KCND2  
Beta-Bisab KCND3  
Beta-Bisab KCNQ1  
Beta-Bisab NR3C2  
Beta-Bisab KCNA3  
Beta-Bisab KCNC3  
Beta-Bisab KCNB1  
Beta-Bisab ADH1C  
Beta-Bisab ALDH2  
Beta-Bisab GUCY1B3  
Beta-Bisab CYP17A1  
Beta-Bisab PRKAB1  
Beta-Bisab KCNA1  
Beta-Bisab ADH1B  
Beta-Bisab KCNB2  
Beta-Bisab KCNA4  
Beta-Bisab GATM  
Beta-Bisab ESR1  
Beta-Bisab ADH1A  
Beta-Bisab KCNA2  
Beta-Bisab DLG4  
Beta-Bisab KCNA5  
Beta-Bisab KCNA7  
Beta-Bisab KCNK4  
Beta-Bisab PGR  
Beta-Bisab KCNA10  
Beta-Bisab TPO  
Beta-Bisab KCNC2  
Beta-Bisab RNASE1  
Beta-Bisab KCNA6  
Beta-Bisab IYD  
Beta-Bisab OPRK1  
Alpha-Pinene KCND1  
Alpha-Pinene GAMT  
Alpha-Pinene CAT  
Alpha-Pinene KCNC1  
Alpha-Pinene KCND2  
Alpha-Pinene KCND3  
Alpha-Pinene KCNQ1  
Alpha-Pinene RDH13  
Alpha-Pinene ALDH1A3  
Alpha-Pinene ALDH1A1  
Alpha-Pinene ALDH1A2  
Alpha-Pinene KCNA3  
Alpha-Pinene KCNC3  
Alpha-Pinene KCNB1  
Alpha-Pinene ADH1C

Alpha-PineneALDH2  
Alpha-PineneGUCY1B3  
Alpha-PineneRDH11  
Alpha-PineneDHRS3  
Alpha-PineneRDH12  
Alpha-PineneRLBP1  
Alpha-PineneNR3C2  
Alpha-PinenePRKAB1  
Alpha-PineneKCNA1  
Alpha-PineneADH1B  
Alpha-PineneKCNB2  
Alpha-PineneKCNA4  
Alpha-PineneGATM  
Alpha-PineneRBP3  
Alpha-PineneRDH5  
Alpha-PineneOPRK1  
Alpha-PineneRDH14  
Alpha-PineneADH1A  
Alpha-PineneKCNA2  
Alpha-PineneDLG4  
Alpha-PineneKCNA5  
Alpha-PineneKCNA7  
Alpha-PineneKCNK4  
Alpha-PineneRETSAT  
Alpha-PineneESR1  
Alpha-PineneDHRS4  
Alpha-PineneRDH8  
Alpha-PineneKCNA10  
Alpha-PineneTPO  
Alpha-PineneKCNC2  
Alpha-PineneRNASE1  
Alpha-PineneKCNA6  
Alpha-PineneIYD  
Alpha-PineneCYP17A1  
Alpha-PinenePGR  
Alpha-PineneRBP1  
Alpha-PineneLRAT  
Hexadecar AKR1D1  
Hexadecar ABAT  
Hexadecar COX5B  
Hexadecar SCN7A  
Hexadecar COX5A  
Hexadecar COX4I1  
Hexadecar SCN4A  
Hexadecar CES1  
Hexadecar COX2  
Hexadecar SUCLG2  
Hexadecar SLC25A10  
Hexadecar SUCNR1  
Hexadecar OXCT1  
Hexadecar SDHA  
Hexadecar DCT  
Hexadecar JMJD6  
Hexadecar HSD17B11  
Hexadecar P4HB  
Hexadecar GRIN3B  
Hexadecar CACNA1B  
Hexadecar GRIN3A

Hexadecar GRIN1  
Hexadecar TYR  
Hexadecar SCN1A  
Hexadecar COX7C  
Hexadecar SCN5A  
Hexadecar COX3  
Hexadecar HDAC9  
Hexadecar SCN4B  
Hexadecar ACADSB  
Hexadecar OGDH  
Hexadecar SLC13A2  
Hexadecar P3H3  
Hexadecar SLC13A3  
Hexadecar PLOD3  
Hexadecar P4HA2  
Hexadecar AKR1C3  
Hexadecar SLC13A4  
Hexadecar TYRP1  
Hexadecar CACNA2D1  
Hexadecar CACNA2D2  
Hexadecar GRIN2C  
Hexadecar SLC7A1  
Hexadecar SRD5A2  
Hexadecar ESRRG  
Hexadecar COX1  
Hexadecar SCN10A  
Hexadecar AR  
Hexadecar PLA2G1B  
Hexadecar ADH1C  
Hexadecar SCN8A  
Hexadecar HDAC2  
Hexadecar SLC13A1  
Hexadecar OXCT2  
Hexadecar ASPH  
Hexadecar P4HA1  
Hexadecar SUCLA2  
Hexadecar CRTAP  
Hexadecar SDHAF2  
Hexadecar HIF1AN  
Hexadecar PLAT  
Hexadecar GRIN2A  
Hexadecar GRIN2B  
Hexadecar SLC7A4  
Hexadecar SCN11A  
Hexadecar SCN3B  
Hexadecar SCN3A  
Hexadecar ALDH5A1  
Hexadecar COX7A1  
Hexadecar COX6A2  
Hexadecar COX6B1  
Hexadecar COX7B  
Hexadecar COX8A  
Hexadecar SUCLG1  
Hexadecar TMLHE  
Hexadecar BBOX1  
Hexadecar SDHC  
Hexadecar SDHD  
Hexadecar SLIT2

Hexadecar SLC1A3  
Hexadecar UROS  
Hexadecar SLC7A2  
Hexadecar TOP1  
Hexadecar SLC7A3  
Hexadecar GRIN2D  
Hexadecar SCN2B  
Hexadecar COX6C  
Hexadecar AKR1C2  
Hexadecar SCN2A  
Hexadecar FECH  
Hexadecar SCN9A  
Hexadecar FABP6  
Hexadecar SCN1B  
Hexadecar NR1H4  
Hexadecar HSD17B6  
Hexadecar PLOD1  
Hexadecar SDHB  
Hexadecar P3H2  
Hexadecar P3H1  
Hexadecar ACO2  
Hexadecar SALL1  
Hexadecar SLC13A5  
Hexadecar CACNA1A  
Hexadecar PLG  
Hexadecar KARS  
Hexadecar ADORA1  
6-Undecar TRPV3  
6-Undecar SCN11A  
6-Undecar SCN3A  
6-Undecar ALDH5A1  
6-Undecar SCN4A  
6-Undecar SCN1B  
6-Undecar OPRK1  
6-Undecar SCN2B  
6-Undecar SCN7A  
6-Undecar SCN2A  
6-Undecar SCN4B  
6-Undecar OGDH  
6-Undecar TRPM8  
6-Undecar ABAT  
6-Undecar SCN5A  
6-Undecar HDAC9  
6-Undecar SRD5A2  
6-Undecar HDAC2  
6-Undecar TRPA1  
6-Undecar SCN1A  
6-Undecar SCN10A  
6-Undecar TYR  
6-Undecar ACADSB  
6-Undecar KCNK4  
6-Undecar SCN3B  
6-Undecar AKR1D1  
6-Undecar SCN9A  
6-Undecar SCN8A  
M-Ethylph GABRA2  
M-Ethylph TNF  
M-Ethylph GABRP

M-Ethylph GABRQ  
M-Ethylph PDE4B  
M-Ethylph COLQ  
M-Ethylph SLC6A4  
M-Ethylph DRD3  
M-Ethylph GABRD  
M-Ethylph GABRE  
M-Ethylph GABRA4  
M-Ethylph GABRB3  
M-Ethylph BCHE  
M-Ethylph LTA  
M-Ethylph DRD4  
M-Ethylph ALOX5  
M-Ethylph PDE3A  
M-Ethylph SCN2A  
M-Ethylph GABRB2  
M-Ethylph GABRA5  
M-Ethylph GABRG2  
M-Ethylph RXRA  
M-Ethylph HTR7  
M-Ethylph DRD5  
M-Ethylph GABRB1  
M-Ethylph GABRA3  
M-Ethylph ACHE  
M-Ethylph GABRA6  
M-Ethylph PDE3B  
M-Ethylph SLC6A3  
M-Ethylph HTR1A  
M-Ethylph DRD1  
M-Ethylph GABRG3  
M-Ethylph GABRG1  
M-Ethylph SCN4A  
M-Ethylph GABRA1  
M-Ethylph PDE4D  
M-Ethylph DRD2  
M-Ethylph DBH  
M-Ethylph SLC6A2  
Carvacrol /SCN10A  
Carvacrol /BCHE  
Carvacrol /ACHE  
Carvacrol /COLQ  
Alpha-AccKCND1  
Alpha-AccGAMT  
Alpha-AccCAT  
Alpha-AccKCNC1  
Alpha-AccKCND2  
Alpha-AccKCND3  
Alpha-AccKCNQ1  
Alpha-AccNR3C2  
Alpha-AccKCNA3  
Alpha-AccKCNC3  
Alpha-AccKCNB1  
Alpha-AccADH1C  
Alpha-AccALDH2  
Alpha-AccGUCY1B3  
Alpha-AccCYP17A1  
Alpha-AccPRKAB1  
Alpha-AccKCNA1



Alpha-AccADH1B  
Alpha-AccKCNB2  
Alpha-AccKCNA4  
Alpha-AccGATM  
Alpha-AccESR1  
Alpha-AccADH1A  
Alpha-AccKCNA2  
Alpha-AccDLG4  
Alpha-AccKCNA5  
Alpha-AccKCNA7  
Alpha-AccKCNK4  
Alpha-AccPGR  
Alpha-AccKCNA10  
Alpha-AccTPO  
Alpha-AccKCNC2  
Alpha-AccRNASE1  
Alpha-AccKCNA6  
Alpha-AccIYD  
Alpha-AccOPRK1  
Adenine ADORA2A  
Adenine PRKAB1  
Adenine ADCY1  
Adenine ADK  
Adenine RRM2  
Adenine PIM1  
Adenine AMD1  
Adenine RRM1  
Adenine ADORA2B  
Adenine ACSS2  
Adenine COMT  
Adenine GNMT  
Adenine PRKAA1  
Adenine PYGL  
Adenine ACSL1  
Adenine ADORA3  
Adenine POLE  
Adenine POLA1  
Adenine PNP  
Adenine MAT1A  
Adenine POLE2  
Adenine PDE4B  
Adenine ADORA1  
Adenine CBS  
Adenine DCK  
Adenine PDE4D  
Adenine CREB1  
Adenine HINT1  
Adenine PRKAB2  
Adenine FBP1  
Adenine POLE3  
Adenine RRM2B  
Adenine CBSL  
Adenine ACSS1  
Adenine MAT2A  
Adenine POLE4  
IsococculicCHRM3  
IsococculicCHRM2  
IsococculicDRD2

|             |         |
|-------------|---------|
| Isococculic | SLC18A2 |
| Isococculic | CHRNA2  |
| Isococculic | BCHE    |
| O-Cresol    | GABRA2  |
| O-Cresol    | TNF     |
| O-Cresol    | GABRP   |
| O-Cresol    | GABRQ   |
| O-Cresol    | PDE4B   |
| O-Cresol    | COLQ    |
| O-Cresol    | GABRD   |
| O-Cresol    | GABRE   |
| O-Cresol    | GABRA4  |
| O-Cresol    | GABRB3  |
| O-Cresol    | BCHE    |
| O-Cresol    | LTA     |
| O-Cresol    | PDE3A   |
| O-Cresol    | SCN2A   |
| O-Cresol    | GABRB2  |
| O-Cresol    | GABRA5  |
| O-Cresol    | GABRG2  |
| O-Cresol    | RXRA    |
| O-Cresol    | GABRB1  |
| O-Cresol    | GABRA3  |
| O-Cresol    | ACHE    |
| O-Cresol    | GABRA6  |
| O-Cresol    | PDE3B   |
| O-Cresol    | GABRG3  |
| O-Cresol    | GABRG1  |
| O-Cresol    | SCN4A   |
| O-Cresol    | GABRA1  |
| O-Cresol    | PDE4D   |
| Retinol     | RDH11   |
| Retinol     | RDH5    |
| Retinol     | ALDH1A1 |
| Retinol     | ALDH1A2 |
| Retinol     | RARRES1 |
| Retinol     | RARB    |
| Retinol     | VDR     |
| Retinol     | RBP3    |
| Retinol     | ALDH1A3 |
| Retinol     | RLBP1   |
| Retinol     | ALDH3A1 |
| Retinol     | NR0B1   |
| Retinol     | RXRG    |
| Retinol     | CYP27B1 |
| Retinol     | RETSAT  |
| Retinol     | RDH12   |
| Retinol     | RDH14   |
| Retinol     | RHO     |
| Retinol     | ESR1    |
| Retinol     | RARA    |
| Retinol     | RDH13   |
| Retinol     | DHRS4   |
| Retinol     | RDH8    |
| Retinol     | RS1     |
| Retinol     | RARG    |
| Retinol     | GPRC5A  |
| Retinol     | DHRS3   |

|            |          |
|------------|----------|
| Retinol    | RBP1     |
| Retinol    | LRAT     |
| Retinol    | RXRB     |
| Retinol    | PGR      |
| Retinol    | RXRA     |
| 1,2-Benzer | PLAT     |
| 1,2-Benzer | BCL2     |
| 1,2-Benzer | PTGS2    |
| 1,2-Benzer | IL13     |
| 1,2-Benzer | AKR1C1   |
| 1,2-Benzer | HCAR2    |
| 1,2-Benzer | FABP2    |
| 1,2-Benzer | NNMT     |
| 1,2-Benzer | THBD     |
| 1,2-Benzer | CFTR     |
| 1,2-Benzer | APOA2    |
| 1,2-Benzer | KCNE2    |
| 1,2-Benzer | PPARG    |
| 1,2-Benzer | HCAR3    |
| 1,2-Benzer | TCAF1    |
| 1,2-Benzer | ANXA1    |
| 1,2-Benzer | QPRT     |
| 1,2-Benzer | PTGS1    |
| 1,2-Benzer | IL1B     |
| 1,2-Benzer | SERPINB7 |
| Dimethyl   | CNPR1    |
| Dimethyl   | CCOX1    |
| Dimethyl   | CAR      |
| Dimethyl   | CCOX6A2  |
| Dimethyl   | CCES1    |
| Dimethyl   | CNR1H4   |
| Dimethyl   | CESRRG   |
| Dimethyl   | CAKR1C2  |
| Dimethyl   | CCOX7A1  |
| Dimethyl   | CTYR     |
| Dimethyl   | CSRD5A2  |
| Dimethyl   | CCOX6C   |
| Dimethyl   | CAKR1D1  |
| Dimethyl   | CFECH    |
| Dimethyl   | CADH1C   |
| Dimethyl   | CCOX7B   |
| Dimethyl   | CCOX5B   |
| Dimethyl   | CCOX5A   |
| Dimethyl   | CCOX4I1  |
| Dimethyl   | CCOX6B1  |
| Dimethyl   | CCOX2    |
| Dimethyl   | CCOX7C   |
| Dimethyl   | CCOX3    |
| Dimethyl   | CPLA2G1B |
| Dimethyl   | CFABP6   |
| Dimethyl   | CCOX8A   |
| Cedrol     | NPR1     |
| Cedrol     | COX1     |
| Cedrol     | AR       |
| Cedrol     | COX6A2   |
| Cedrol     | CES1     |
| Cedrol     | NR1H4    |
| Cedrol     | ESRRG    |

|            |          |
|------------|----------|
| Cedrol     | AKR1C2   |
| Cedrol     | COX7A1   |
| Cedrol     | TYR      |
| Cedrol     | SRD5A2   |
| Cedrol     | COX6C    |
| Cedrol     | AKR1D1   |
| Cedrol     | FECH     |
| Cedrol     | ADH1C    |
| Cedrol     | COX7B    |
| Cedrol     | COX5B    |
| Cedrol     | COX5A    |
| Cedrol     | COX4I1   |
| Cedrol     | COX6B1   |
| Cedrol     | COX2     |
| Cedrol     | COX7C    |
| Cedrol     | COX3     |
| Cedrol     | PLA2G1B  |
| Cedrol     | FABP6    |
| Cedrol     | COX8A    |
| Choline    | PLD1     |
| Choline    | PLD2     |
| Choline    | PCYT1A   |
| Choline    | BCHE     |
| Choline    | PCYT1B   |
| Choline    | COLQ     |
| Choline    | PHOSPHO1 |
| Choline    | ACHE     |
| 3(S)-3-But | CHRM3    |
| 3(S)-3-But | AR       |
| 3(S)-3-But | CHRM1    |
| 3(S)-3-But | NR3C1    |
| 3(S)-3-But | CHRM2    |
| 3(S)-3-But | CYP19A1  |
| 3(S)-3-But | ESR1     |
| 3(S)-3-But | NR3C2    |
| 3(S)-3-But | PGR      |
| 1-Tetradec | TRPV3    |
| 1-Tetradec | GRIA4    |
| 1-Tetradec | CHRNA3   |
| 1-Tetradec | GABRG3   |
| 1-Tetradec | GABRA3   |
| 1-Tetradec | CHRNA10  |
| 1-Tetradec | CACNA1C  |
| 1-Tetradec | CHRNA2   |
| 1-Tetradec | HTR3B    |
| 1-Tetradec | GABRA6   |
| 1-Tetradec | CHRNA5   |
| 1-Tetradec | CACNG1   |
| 1-Tetradec | DMTN     |
| 1-Tetradec | SCN1A    |
| 1-Tetradec | SCN10A   |
| 1-Tetradec | TYR      |
| 1-Tetradec | ACADSB   |
| 1-Tetradec | OPRK1    |
| 1-Tetradec | GABRA2   |
| 1-Tetradec | GABRB1   |
| 1-Tetradec | VCAM1    |
| 1-Tetradec | SLC29A1  |

1-TetradecGRIA2  
1-TetradecCHRNA2  
1-TetradecCHRNA6  
1-TetradecGRIA3  
1-TetradecHTR3A  
1-TetradecCHRNA4  
1-TetradecADAM8  
1-TetradecKCNMA1  
1-TetradecSCN3B  
1-TetradecAKR1D1  
1-TetradecSCN9A  
1-TetradecSCN8A  
1-TetradecTRPM8  
1-TetradecCACNG2  
1-TetradecGRIA1  
1-TetradecCHRNA7  
1-TetradecCACNA1S  
1-TetradecGABRA4  
1-TetradecCACNA1D  
1-TetradecGABRB3  
1-TetradecGABRA5  
1-TetradecGABRA1  
1-TetradecKCNJ9  
1-TetradecSLC28A3  
1-TetradecSCN11A  
1-TetradecSCN3A  
1-TetradecALDH5A1  
1-TetradecSCN4A  
1-TetradecSCN1B  
1-TetradecTRPA1  
1-TetradecGABRD  
1-TetradecGLRA2  
1-TetradecKCNJ6  
1-TetradecGABRG1  
1-TetradecCHRNA3  
1-TetradecHTR3D  
1-TetradecKCNJ5  
1-TetradecSLC29A2  
1-TetradecCHRNA9  
1-TetradecHTR3C  
1-TetradecADRA1B  
1-TetradecSCN2B  
1-TetradecSCN7A  
1-TetradecSCN2A  
1-TetradecSCN4B  
1-TetradecOGDH  
1-TetradecCACNB1  
1-TetradecCHRNA4  
1-TetradecKCNJ3  
1-TetradecGABRE  
1-TetradecGABRP  
1-TetradecGABRB2  
1-TetradecGABRQ  
1-TetradecGRIN3A  
1-TetradecHTR3E  
1-TetradecCHRFAM7A  
1-TetradecGLRA1  
1-TetradecFOXL2

1-TetradecABAT  
1-TetradecSCN5A  
1-TetradecHDAC9  
1-TetradecSRD5A2  
1-TetradecHDAC2  
Anisic AcidRXRB  
Anisic AcidPTGS2  
Anisic AcidTNF  
Anisic AcidPRKAG2  
Anisic AcidHSPA5  
Anisic AcidPRKAG3  
Anisic AcidRARG  
Anisic AcidRARA  
Anisic AcidHNRNPK  
Anisic AcidNFKB1  
Anisic AcidPRKAA2  
Anisic AcidIKBKB  
Anisic AcidRARB  
Anisic AcidPPARA  
Anisic AcidCOL27A1  
Anisic AcidEDNRA  
Anisic AcidAKR1C1  
Anisic AcidPRKAB2  
Anisic AcidRXRG  
Anisic AcidRXRA  
Anisic AcidSERPINB7  
Anisic AcidNFKBIA  
Anisic AcidPRKAG1  
Anisic AcidRPS6KA3  
Anisic AcidPTGS1  
Anisic AcidTP53  
Anisic AcidPRKAB1  
Anisic AcidNFKB2  
Anisic AcidPRKAA1  
Phyllanthir ESR2  
Phyllanthir ESR1  
Phyllanthir NR1I2  
Phyllanthir ALOX5  
PentylbenzGABRB2  
PentylbenzADRA1A  
PentylbenzADRB1  
PentylbenzSLC18A2  
PentylbenzTAAR1  
PentylbenzGABRB3  
PentylbenzS1PR5  
PentylbenzADRA1D  
PentylbenzADRA1B  
PentylbenzCARTPT  
PentylbenzF2  
PentylbenzADRB2  
PentylbenzDRD2  
PentylbenzADRA2C  
PentylbenzADRA2B  
PentylbenzGPR27  
PentylbenzADRA2A  
PentylbenzMAOA  
PentylbenzALOX5  
PentylbenzSLC6A2

PentylbenzSLC6A3  
PentylbenzMAOB  
PentylbenzSLC6A4  
PentylbenzADRB3  
CampheneKCND1  
CampheneGAMT  
CampheneCAT  
CampheneKCNC1  
CampheneKCND2  
CampheneKCND3  
CampheneKCNQ1  
CampheneKCNA3  
CampheneKCNC3  
CampheneKCNB1  
CampheneADH1C  
CampheneALDH2  
CampheneGUCY1B3  
CamphenePRKAB1  
CampheneKCNA1  
CampheneADH1B  
CampheneKCNB2  
CampheneKCNA4  
CampheneGATM  
CampheneADH1A  
CampheneKCNA2  
CampheneDLG4  
CampheneKCNA5  
CampheneKCNA7  
CampheneKCNK4  
CampheneKCNA10  
CampheneTPO  
CampheneKCNC2  
CampheneRNASE1  
CampheneKCNA6  
CampheneIYD  
20-HexadePRKCA  
20-HexadePRKCD  
P-Cresol GABRA2  
P-Cresol TNF  
P-Cresol GABRP  
P-Cresol GABRQ  
P-Cresol PDE4B  
P-Cresol COLQ  
P-Cresol GABRD  
P-Cresol GABRE  
P-Cresol GABRA4  
P-Cresol GABRB3  
P-Cresol BCHE  
P-Cresol LTA  
P-Cresol PDE3A  
P-Cresol SCN2A  
P-Cresol GABRB2  
P-Cresol GABRA5  
P-Cresol GABRG2  
P-Cresol RXRA  
P-Cresol GABRB1  
P-Cresol GABRA3  
P-Cresol ACHE

P-Cresol GABRA6  
P-Cresol PDE3B  
P-Cresol GABRG3  
P-Cresol GABRG1  
P-Cresol SCN4A  
P-Cresol GABRA1  
P-Cresol PDE4D  
Vitamin B1SLC19A2  
Vitamin B1TPK1  
Vitamin B1THTPA  
1,2-DimetlKCND1  
1,2-DimetlGAMT  
1,2-DimetlCAT  
1,2-DimetlKCNC1  
1,2-DimetlKCND2  
1,2-DimetlKCND3  
1,2-DimetlKCNQ1  
1,2-DimetlKCNA3  
1,2-DimetlKCNC3  
1,2-DimetlKCNB1  
1,2-DimetlADH1C  
1,2-DimetlALDH2  
1,2-DimetlGUCY1B3  
1,2-DimetlPRKAB1  
1,2-DimetlKCNA1  
1,2-DimetlADH1B  
1,2-DimetlKCNB2  
1,2-DimetlKCNA4  
1,2-DimetlGATM  
1,2-DimetlADH1A  
1,2-DimetlKCNA2  
1,2-DimetlDLG4  
1,2-DimetlKCNA5  
1,2-DimetlKCNA7  
1,2-DimetlKCNK4  
1,2-DimetlKCNA10  
1,2-DimetlTPO  
1,2-DimetlKCNC2  
1,2-DimetlRNASE1  
1,2-DimetlKCNA6  
1,2-DimetlIYD  
Cnidilide CHRM3  
Cnidilide AR  
Cnidilide HDAC2  
Cnidilide CHRM1  
Cnidilide NR3C1  
Cnidilide NR3C2  
Cnidilide CHRM2  
Cnidilide HMGCR  
Cnidilide ESR1  
Cnidilide ITGB2  
Cnidilide PGR  
Cnidilide ITGAL  
Beta-Acor:KCND1  
Beta-Acor:GAMT  
Beta-Acor:CAT  
Beta-Acor:KCNC1  
Beta-Acor:KCND2



Beta-Acor:KCND3  
Beta-Acor:KCNQ1  
Beta-Acor:NR3C2  
Beta-Acor:KCNA3  
Beta-Acor:KCNC3  
Beta-Acor:KCNB1  
Beta-Acor:ADH1C  
Beta-Acor:ALDH2  
Beta-Acor:GUCY1B3  
Beta-Acor:CYP17A1  
Beta-Acor:PRKAB1  
Beta-Acor:KCNA1  
Beta-Acor:ADH1B  
Beta-Acor:KCNB2  
Beta-Acor:KCNA4  
Beta-Acor:GATM  
Beta-Acor:ESR1  
Beta-Acor:ADH1A  
Beta-Acor:KCNA2  
Beta-Acor:DLG4  
Beta-Acor:KCNA5  
Beta-Acor:KCNA7  
Beta-Acor:KCNK4  
Beta-Acor:PGR  
Beta-Acor:KCNA10  
Beta-Acor:TPO  
Beta-Acor:KCNC2  
Beta-Acor:RNASE1  
Beta-Acor:KCNA6  
Beta-Acor:IYD  
Beta-Acor:OPRK1  
Decanal SCN11A  
Decanal SCN3A  
Decanal ALDH5A1  
Decanal SCN4A  
Decanal SCN1B  
Decanal SCN2B  
Decanal SCN7A  
Decanal SCN2A  
Decanal SCN4B  
Decanal OGDH  
Decanal ABAT  
Decanal SCN5A  
Decanal HDAC9  
Decanal SRD5A2  
Decanal HDAC2  
Decanal SCN1A  
Decanal SCN10A  
Decanal TYR  
Decanal ACADSB  
Decanal SCN3B  
Decanal AKR1D1  
Decanal SCN9A  
Decanal SCN8A  
Brefeldin AHMGCR  
Brefeldin APGR  
Brefeldin AITGB2  
Brefeldin AAR

Brefeldin AITGAL  
Brefeldin AHDAC2  
Brefeldin AESR1  
Stigmaster KCND1  
Stigmaster GAMT  
Stigmaster CAT  
Stigmaster KCNC1  
Stigmaster KCND2  
Stigmaster KCND3  
Stigmaster KCNQ1  
Stigmaster RDH13  
Stigmaster ALDH1A3  
Stigmaster ALDH1A1  
Stigmaster ALDH1A2  
Stigmaster KCNA3  
Stigmaster KCNC3  
Stigmaster KCNB1  
Stigmaster ADH1C  
Stigmaster ALDH2  
Stigmaster GUCY1B3  
Stigmaster RDH11  
Stigmaster DHRS3  
Stigmaster RDH12  
Stigmaster RLBP1  
Stigmaster NR3C2  
Stigmaster PRKAB1  
Stigmaster KCNA1  
Stigmaster ADH1B  
Stigmaster KCNB2  
Stigmaster KCNA4  
Stigmaster GATM  
Stigmaster RBP3  
Stigmaster RDH5  
Stigmaster OPRK1  
Stigmaster RDH14  
Stigmaster ADH1A  
Stigmaster KCNA2  
Stigmaster DLG4  
Stigmaster KCNA5  
Stigmaster KCNA7  
Stigmaster KCNK4  
Stigmaster RETSAT  
Stigmaster ESR1  
Stigmaster DHRS4  
Stigmaster RDH8  
Stigmaster KCNA10  
Stigmaster TPO  
Stigmaster KCNC2  
Stigmaster RNASE1  
Stigmaster KCNA6  
Stigmaster IYD  
Stigmaster CYP17A1  
Stigmaster PGR  
Stigmaster RBP1  
Stigmaster LRAT  
Nonanal SCN11A  
Nonanal SCN3A  
Nonanal ALDH5A1

Nonanal SCN4A  
Nonanal SCN1B  
Nonanal SCN2B  
Nonanal SCN7A  
Nonanal SCN2A  
Nonanal SCN4B  
Nonanal OGDH  
Nonanal ABAT  
Nonanal SCN5A  
Nonanal HDAC9  
Nonanal SRD5A2  
Nonanal HDAC2  
Nonanal SCN1A  
Nonanal SCN10A  
Nonanal TYR  
Nonanal ACADSB  
Nonanal SCN3B  
Nonanal AKR1D1  
Nonanal SCN9A  
Nonanal SCN8A  
Vitamin B1MUT  
Vitamin B1MTHFR  
Vitamin B1CBS  
Vitamin B1MTRR  
Vitamin B1TCN1  
Vitamin B1CEBPA  
Vitamin B1MTR  
Vitamin B1MMAB  
Vitamin B1WDHD1  
Vitamin B1MMACHC  
Vitamin B1CUBN  
Vitamin B1MMAA  
Vitamin B1AMN  
1-HexadecTRPV3  
1-HexadecGRIA4  
1-HexadecCHRNA3  
1-HexadecGABRG3  
1-HexadecGABRA3  
1-HexadecCHRNA10  
1-HexadecCACNA1C  
1-HexadecCHRNA2  
1-HexadecHTR3B  
1-HexadecGABRA6  
1-HexadecCHRNA5  
1-HexadecCACNG1  
1-HexadecDMTN  
1-HexadecSCN1A  
1-HexadecSCN10A  
1-HexadecTYR  
1-HexadecACADSB  
1-HexadecOPRK1  
1-HexadecGABRA2  
1-HexadecGABRB1  
1-HexadecVCAM1  
1-HexadecSLC29A1  
1-HexadecGRIA2  
1-HexadecCHRNA2  
1-HexadecCHRNA6

1-HexadecGRIA3  
1-HexadecHTR3A  
1-HexadecCHRNA4  
1-HexadecADAM8  
1-HexadecKCNMA1  
1-HexadecSCN3B  
1-HexadecAKR1D1  
1-HexadecSCN9A  
1-HexadecSCN8A  
1-HexadecTRPM8  
1-HexadecCACNG2  
1-HexadecGRIA1  
1-HexadecCHRNA7  
1-HexadecCACNA1S  
1-HexadecGABRA4  
1-HexadecCACNA1D  
1-HexadecGABRB3  
1-HexadecGABRA5  
1-HexadecGABRA1  
1-HexadecKCNJ9  
1-HexadecSLC28A3  
1-HexadecSCN11A  
1-HexadecSCN3A  
1-HexadecALDH5A1  
1-HexadecSCN4A  
1-HexadecSCN1B  
1-HexadecTRPA1  
1-HexadecGABRD  
1-HexadecGLRA2  
1-HexadecKCNJ6  
1-HexadecGABRG1  
1-HexadecCHRNA3  
1-HexadecHTR3D  
1-HexadecKCNJ5  
1-HexadecSLC29A2  
1-HexadecCHRNA9  
1-HexadecHTR3C  
1-HexadecADRA1B  
1-HexadecSCN2B  
1-HexadecSCN7A  
1-HexadecSCN2A  
1-HexadecSCN4B  
1-HexadecOGDH  
1-HexadecCACNB1  
1-HexadecCHRNA4  
1-HexadecKCNJ3  
1-HexadecGABRE  
1-HexadecGABRP  
1-HexadecGABRB2  
1-HexadecGABRQ  
1-HexadecGRIN3A  
1-HexadecHTR3E  
1-HexadecCHRFAM7A  
1-HexadecGLRA1  
1-HexadecFOXL2  
1-HexadecABAT  
1-HexadecSCN5A  
1-HexadecHDAC9

1-HexadecSRD5A2  
1-HexadecHDAC2  
4-OctanorSCN3A  
4-OctanorSCN2A  
4-OctanorACADSB  
4-OctanorSCN11A  
4-OctanorSCN7A  
4-OctanorHDAC9  
4-OctanorSCN8A  
4-OctanorSCN2B  
4-OctanorSCN5A  
4-OctanorSCN9A  
4-OctanorSCN1B  
4-OctanorABAT  
4-OctanorSCN10A  
4-OctanorSCN4A  
4-OctanorOGDH  
4-OctanorSCN1A  
4-OctanorALDH5A1  
4-OctanorSCN4B  
4-OctanorHDAC2  
P-EthylpheGABRA2  
P-EthylpheTNF  
P-EthylpheGABRP  
P-EthylpheGABRQ  
P-EthylphePDE4B  
P-EthylpheCOLQ  
P-EthylpheSLC6A4  
P-EthylpheDRD3  
P-EthylpheGABRD  
P-EthylpheGABRE  
P-EthylpheGABRA4  
P-EthylpheGABRB3  
P-EthylpheBCHE  
P-EthylpheLTA  
P-EthylpheDRD4  
P-EthylpheALOX5  
P-EthylphePDE3A  
P-EthylpheSCN2A  
P-EthylpheGABRB2  
P-EthylpheGABRA5  
P-EthylpheGABRG2  
P-EthylpheRXRA  
P-EthylpheHTR7  
P-EthylpheDRD5  
P-EthylpheGABRB1  
P-EthylpheGABRA3  
P-EthylpheACHE  
P-EthylpheGABRA6  
P-EthylphePDE3B  
P-EthylpheSLC6A3  
P-EthylpheHTR1A  
P-EthylpheDRD1  
P-EthylpheGABRG3  
P-EthylpheGABRG1  
P-EthylpheSCN4A  
P-EthylpheGABRA1  
P-EthylphePDE4D

P-EthylpheDRD2  
P-EthylpheDBH  
P-EthylpheSLC6A2  
CamphereiVDR  
CamphereiESR1  
CamphereiCYP27B1  
CamphereiPGR  
CamphereiGC  
CamphereiSNW1  
CamphereiF12  
Beta-CarycKCND1  
Beta-CarycGAMT  
Beta-CarycCAT  
Beta-CarycKCNC1  
Beta-CarycKCND2  
Beta-CarycKCND3  
Beta-CarycKCNQ1  
Beta-CarycKCNA3  
Beta-CarycKCNC3  
Beta-CarycKCNB1  
Beta-CarycADH1C  
Beta-CarycALDH2  
Beta-CarycGUCY1B3  
Beta-CarycPRKAB1  
Beta-CarycKCNA1  
Beta-CarycADH1B  
Beta-CarycKCNB2  
Beta-CarycKCNA4  
Beta-CarycGATM  
Beta-CarycADH1A  
Beta-CarycKCNA2  
Beta-CarycDLG4  
Beta-CarycKCNA5  
Beta-CarycKCNA7  
Beta-CarycKCNK4  
Beta-CarycKCNA10  
Beta-CarycTPO  
Beta-CarycKCNC2  
Beta-CarycRNASE1  
Beta-CarycKCNA6  
Beta-CarycIYD  
1-DodecerKCND1  
1-DodecerGAMT  
1-DodecerCAT  
1-DodecerKCNC1  
1-DodecerKCND2  
1-DodecerKCND3  
1-DodecerKCNQ1  
1-DodecerKCNA3  
1-DodecerKCNC3  
1-DodecerKCNB1  
1-DodecerADH1C  
1-DodecerALDH2  
1-DodecerGUCY1B3  
1-DodecerPRKAB1  
1-DodecerKCNA1  
1-DodecerADH1B  
1-DodecerKCNB2

1-DodecerKCNA4  
1-DodecerGATM  
1-DodecerADH1A  
1-DodecerKCNA2  
1-DodecerDLG4  
1-DodecerKCNA5  
1-DodecerKCNA7  
1-DodecerKCNK4  
1-DodecerKCNA10  
1-DodecerTPO  
1-DodecerKCNC2  
1-DodecerRNASE1  
1-DodecerKCNA6  
1-DodecerIYD  
Guaiacol TYR  
Guaiacol DCT  
Guaiacol TYRP1  
M-Cresol TNF  
M-Cresol GABRP  
M-Cresol GABRQ  
M-Cresol PDE4B  
M-Cresol COLQ  
M-Cresol GABRA2  
M-Cresol GABRE  
M-Cresol GABRA4  
M-Cresol GABRB3  
M-Cresol BCHE  
M-Cresol LTA  
M-Cresol GABRD  
M-Cresol SCN2A  
M-Cresol GABRB2  
M-Cresol GABRA5  
M-Cresol GABRG2  
M-Cresol RXRA  
M-Cresol PDE3A  
M-Cresol GABRA3  
M-Cresol ACHE  
M-Cresol GABRA6  
M-Cresol PDE3B  
M-Cresol GABRB1  
M-Cresol GABRG1  
M-Cresol SCN4A  
M-Cresol GABRA1  
M-Cresol PDE4D  
Isofernene KCND1  
Isofernene GAMT  
Isofernene CAT  
Isofernene KCNC1  
Isofernene KCND2  
Isofernene KCND3  
Isofernene KCNQ1  
Isofernene RDH13  
Isofernene ALDH1A3  
Isofernene ALDH1A1  
Isofernene ALDH1A2  
Isofernene KCNA3  
Isofernene KCNC3  
Isofernene KCNB1

Isofernene ADH1C  
Isofernene ALDH2  
Isofernene GUCY1B3  
Isofernene RDH11  
Isofernene DHRS3  
Isofernene RDH12  
Isofernene RLBP1  
Isofernene NR3C2  
Isofernene PRKAB1  
Isofernene KCNA1  
Isofernene ADH1B  
Isofernene KCNB2  
Isofernene KCNA4  
Isofernene GATM  
Isofernene RBP3  
Isofernene RDH5  
Isofernene OPRK1  
Isofernene RDH14  
Isofernene ADH1A  
Isofernene KCNA2  
Isofernene DLG4  
Isofernene KCNA5  
Isofernene KCNA7  
Isofernene KCNK4  
Isofernene RETSAT  
Isofernene ESR1  
Isofernene DHRS4  
Isofernene RDH8  
Isofernene KCNA10  
Isofernene TPO  
Isofernene KCNC2  
Isofernene RNASE1  
Isofernene KCNA6  
Isofernene IYD  
Isofernene CYP17A1  
Isofernene PGR  
Isofernene RBP1  
Isofernene LRAT  
Hexanoic /CHRM1  
Hexanoic /CHRM2  
Crinamine CHRNG  
Crinamine CHRNA10  
Crinamine CHRNA2  
Crinamine CHR FAM7A  
Crinamine CHRNA4  
Crinamine CHRNA3  
Crinamine CHRNA6  
Crinamine CHRNA5  
Crinamine CHRNB3  
Crinamine CHRNB2  
Crinamine CHRND  
Crinamine CHRNB4  
Crinamine CHRNA7  
Crinamine ACHE  
Crinamine BCHE  
Crinamine CHRNB1  
Crinamine CHRNA1  
Crinamine CHRNE



Crinamine CHRNA9  
6-UndecarSCN11A  
6-UndecarSCN3A  
6-UndecarALDH5A1  
6-UndecarSCN4A  
6-UndecarSCN1B  
6-UndecarSCN2B  
6-UndecarSCN7A  
6-UndecarSCN2A  
6-UndecarSCN4B  
6-UndecarOGDH  
6-UndecarABAT  
6-UndecarSCN5A  
6-UndecarHDAC9  
6-UndecarSRD5A2  
6-UndecarHDAC2  
6-UndecarSCN1A  
6-UndecarSCN10A  
6-UndecarTYR  
6-UndecarACADSB  
6-UndecarSCN3B  
6-UndecarAKR1D1  
6-UndecarSCN9A  
6-UndecarSCN8A  
Alpha-ChaKCND1  
Alpha-ChaGAMT  
Alpha-ChaCAT  
Alpha-ChaKCNC1  
Alpha-ChaKCND2  
Alpha-ChaKCND3  
Alpha-ChaKCNQ1  
Alpha-ChaRDH13  
Alpha-ChaALDH1A3  
Alpha-ChaALDH1A1  
Alpha-ChaALDH1A2  
Alpha-ChaKCNA3  
Alpha-ChaKCNC3  
Alpha-ChaKCNB1  
Alpha-ChaADH1C  
Alpha-ChaALDH2  
Alpha-ChaGUCY1B3  
Alpha-ChaRDH11  
Alpha-ChaDHRS3  
Alpha-ChaRDH12  
Alpha-ChaRLBP1  
Alpha-ChaNR3C2  
Alpha-ChaPRKAB1  
Alpha-ChaKCNA1  
Alpha-ChaADH1B  
Alpha-ChaKCNB2  
Alpha-ChaKCNA4  
Alpha-ChaGATM  
Alpha-ChaRBP3  
Alpha-ChaRDH5  
Alpha-ChaOPRK1  
Alpha-ChaRDH14  
Alpha-ChaADH1A  
Alpha-ChaKCNA2

Alpha-ChaDLG4  
Alpha-ChaKCNA5  
Alpha-ChaKCNA7  
Alpha-ChaKCNK4  
Alpha-ChaRETSAT  
Alpha-ChaESR1  
Alpha-ChaDHRS4  
Alpha-ChaRDH8  
Alpha-ChaKCNA10  
Alpha-ChaTPO  
Alpha-ChaKCNC2  
Alpha-ChaRNASE1  
Alpha-ChaKCNA6  
Alpha-ChaIYD  
Alpha-ChaCYP17A1  
Alpha-ChaPGR  
Alpha-ChaRBP1  
Alpha-ChaLRAT  
3-Carene KCND1  
3-Carene GAMT  
3-Carene CAT  
3-Carene KCNC1  
3-Carene KCND2  
3-Carene KCND3  
3-Carene KCNQ1  
3-Carene KCNA3  
3-Carene KCNC3  
3-Carene KCNB1  
3-Carene ADH1C  
3-Carene ALDH2  
3-Carene GUCY1B3  
3-Carene ESR1  
3-Carene PRKAB1  
3-Carene KCNA1  
3-Carene ADH1B  
3-Carene KCNB2  
3-Carene KCNA4  
3-Carene GATM  
3-Carene PGR  
3-Carene ADH1A  
3-Carene KCNA2  
3-Carene DLG4  
3-Carene KCNA5  
3-Carene KCNA7  
3-Carene KCNK4  
3-Carene KCNA10  
3-Carene TPO  
3-Carene KCNC2  
3-Carene RNASE1  
3-Carene KCNA6  
3-Carene IYD
