# Supplementary material for: Network Pharmacology-Based Strategy to Investigate Pharmacological Mechanisms of the Drug Pair Astragalus-Angelica for Treatment of Male Infertility
Source: Hindawi journal article supplement (doi:10.1155/2021/8281506), 2021-10-16
Supplement: f1 [file 8281506.f1.zip]

| SUID | Degree | name                                |
|------|--------|-------------------------------------|
| 73   | 80     | quercetin                           |
| 76   | 2      | Uracil                              |
| 78   | 16     | Î' etaine                           |
| 80   | 46     | isorhamnetin                        |
| 82   | 92     | kaempferol                          |
| 84   | 6      | Chrysanthemaxanthin                 |
| 86   | 48     | Uridine                             |
| 88   | 78     | Canavanine                          |
| 90   | 2      | Astragaloside Vi                    |
| 92   | 2      | Astramembrannin I                   |
| 94   | 2      | Astragaloside V                     |
| 96   | 2      | Astragaloside Iii                   |
| 98   | 30     | Sucrose                             |
| 100  | 2      | Astragaloside Vii                   |
| 102  | 16     | Jaranol                             |
| 105  | 24     | 3,9-di-O-methylnissolin             |
| 107  | 50     | 7-O-methylisomucronulatol           |
| 109  | 56     | formononetin                        |
| 111  | 36     | Calycosin                           |
| 115  | 8      | Bifendate                           |
| 117  | 58     | 3,5-Dimethoxystilbene               |
| 119  | 46     | Guanosine                           |
| 121  | 114    | Cetylic Acid                        |
| 123  | 56     | Myristic Acid                       |
| 125  | 56     | Lignoceric Acid                     |
| 127  | 46     | Dodecenoic Acid                     |
| 129  | 70     | Sebiferic Acid                      |
| 132  | 28     | Phenylacetic Acid                   |
| 134  | 20     | Pentylbenzene                       |
| 136  | 88     | Stigmasterol                        |
| 138  | 16     | FERULIC ACID (CIS)                  |
| 140  | 20     | vanillin                            |
| 145  | 4      | 3-O-trans ferulylquinic acid        |
| 147  | 2      | 7-Hydroxycoumarin                   |
| 149  | 8      | Scopoletol                          |
| 151  | 42     | Kumatakenin                         |
| 154  | 24     | 1,2-Benzenedicarboxylic Acid        |
| 156  | 84     | beta-sitosterol                     |
| 161  | 40     | Carvacrol                           |
| 163  | 34     | 4-Ethylresorcinol                   |
| 165  | 34     | M-Ethylphenol                       |
| 167  | 34     | P-Ethylphenol                       |
| 172  | 38     | 1-Methyl-2-Dodecyl-4-(1h)-Quinolone |
| 174  | 6      | Dimethyl Phthalate                  |
| 180  | 24     | Betaine                             |
| 190  | 20     | Ethanol                             |
| 192  | 26     | 1-Tetradecanol                      |
| 194  | 26     | 1-Hexadecanol                       |
| 196  | 12     | 3(S)-3-Butyl-4,5-Dihydrophthalide   |
| 203  | 14     | Succinic Acid                       |

|     |                                                  |
|-----|--------------------------------------------------|
| 205 | 14 Sebacic Acid                                  |
| 207 | 62 Azelaic Acid                                  |
| 210 | 22 Dimethyl-Beta-Propiothetin                    |
| 212 | 48 Decanoic Acid                                 |
| 214 | 48 Hexadecanoic Acid                             |
| 216 | 24 4-Hydroxycoumarin, Folinic Acid               |
| 219 | 16 3-Hydroxycoumarin, Folic Acid                 |
| 222 | 50 Adenine                                       |
| 224 | 12 Vitamin B12                                   |
| 227 | 38 Anisic Acid                                   |
| 229 | 22 Choline                                       |
| 232 | 16 Cnidilide                                     |
| 234 | 14 Brefeldin A                                   |
| 243 | 38 Angelicin                                     |
| 250 | 40 Retinol                                       |
| 286 | 10 20-Hexadecanoylingenol                        |
| 302 | 8 Crinamine                                      |
| 323 | 2 FA                                             |
| 327 | 18 24, 24-Dimethyl-5alpha-Cholesta-8-En-3beta-01 |
| 329 | 14 Alpha-Terpineol                               |
| 332 | 40 Bicycloelemene                                |
| 334 | 20 Limonene                                      |
| 336 | 20 Beta-Bisabolene                               |
| 338 | 32 Alpha-Pinene                                  |
| 340 | 20 Alpha-Acoradiene                              |
| 345 | 20 Beta-Acoradiene                               |
| 349 | 10 Campherenol                                   |
| 351 | 32 Isofernene                                    |
| 353 | 32 Alpha-Chamigrene                              |
| 355 | 18 3-Carene                                      |
| 359 | 30 itosterol, Î' -Sitosterol                     |
| 361 | 2 Mairin                                         |
| 363 | 16 hederagenin                                   |
| 366 | 10 Soyasapogenol B                               |
| 369 | 40 Gamma-Sitosterol                              |
| 371 | 36 Lupeol                                        |
| 385 | 6 Phenol                                         |
| 388 | 6 2-Methyl-Dodecane-5-One                        |
| 390 | 22 Dimethyl Azelate                              |
| 393 | 22 Dimethyl Sebacate                             |
| 398 | 6 6-Undecanol                                    |
| 400 | 20 Dimethyl Camphorate                           |
| 402 | 20 Cedrol                                        |
| 405 | 6 Decanal                                        |
| 407 | 6 Nonanal                                        |
| 410 | 2 Guaiacol                                       |
| 412 | 6 6-Undecanone                                   |
| 420 | 24 Stigmasterol-Î' -D-Glucoside                  |
| 422 | 28 Astragaloside Viii                            |
| 431 | 26 0-Cresol                                      |
| 433 | 4 2, 3-Dicresol                                  |

|      |                                                       |
|------|-------------------------------------------------------|
| 438  | 26 Dihydropinosylvin                                  |
| 443  | 24 P-Cresol                                           |
| 447  | 18 M-Cresol                                           |
| 450  | 12 beta-Chamigrene                                    |
| 452  | 24 ()-Cuparene                                        |
| 461  | 8 5-Hydroxycoumarin, Guaiacol                         |
| 464  | 8 Isoeugenol                                          |
| 466  | 6 Astragaloside I                                     |
| 468  | 4 Astragaloside Ii                                    |
| 502  | 6 Glucuronic Acid                                     |
| 511  | 10 Ethyl-P-Methoxycinnamate                           |
| 532  | 6 1,7-Dihydroxy-3,9-dimethoxy pterocarpene            |
| 595  | 2 Carvacrol Acetate                                   |
| 643  | 10 1,1,5-Trimethyl-2-Formyl-Cyclohexa-2,5-Diene-4-One |
| 692  | 4 senkyunolide-D                                      |
| 705  | 14 Beta-Myrcene                                       |
| 707  | 14 Tetradecane                                        |
| 709  | 14 Beta-Elemene                                       |
| 711  | 14 1-Tridecene                                        |
| 714  | 14 Alloocimene                                        |
| 720  | 14 Camphene                                           |
| 722  | 14 1,2-Dimethylbenzene                                |
| 726  | 14 Beta-Caryophyllene                                 |
| 728  | 14 1-Dodecene                                         |
| 779  | 6 Phyllanthin                                         |
| 974  | 8 2',4'-Dihydroxyacetophenone                         |
| 985  | 12 senkyunolide-C                                     |
| 988  | 10 senkyunolide-E                                     |
| 999  | 4 9,10-dimethoxypterocarpan-3-O-β-D-glucoside         |
| 1096 | 2 Niacin, Nicotinic Acid                              |
| 1131 | 2 Maruzen M, P-Ethylphenol                            |
| 1202 | 2 Acetyl Astragaloside I                              |
| 1206 | 2 Isoastragaloside I                                  |
| 1331 | 2 Scopoletin                                          |
| 1346 | 2 Vitamin B1                                          |
| 1452 | 2 Soyasaponin 1                                       |
| 1464 | 6 Isococculidine                                      |
| 1590 | 2 4-Octanone                                          |
| 1629 | 2 Hexanoic Acid                                       |
