# Supplementary material for: Network Pharmacology-Based Strategy to Investigate Pharmacological Mechanisms of the Drug Pair Astragalus-Angelica for Treatment of Male Infertility
Source: Hindawi journal article supplement (doi:10.1155/2021/8281506), 2021-10-16
Supplement: f1 [file 8281506.f1.zip]

| Ingredient      | Target |
|-----------------|--------|
| beta-sitosterol | PGR    |
| beta-sitosterol | NCOA2  |
| beta-sitosterol | PTGS1  |
| beta-sitosterol | PTGS2  |
| beta-sitosterol | HSP90  |
| beta-sitosterol | PIK3CG |
| beta-sitosterol | KCNH2  |
| beta-sitosterol | PRKACA |
| beta-sitosterol | DRD1   |
| beta-sitosterol | CHRM3  |
| beta-sitosterol | CHRM1  |
| beta-sitosterol | SCN5A  |
| beta-sitosterol | GABRA2 |
| beta-sitosterol | CHRM4  |
| beta-sitosterol | PDE3A  |
| beta-sitosterol | HTR2A  |
| beta-sitosterol | GABRA5 |
| beta-sitosterol | ADRA1A |
| beta-sitosterol | GABRA3 |
| beta-sitosterol | CHRM2  |
| beta-sitosterol | ADRA1B |
| beta-sitosterol | ADRB2  |
| beta-sitosterol | CHRNA2 |
| beta-sitosterol | SLC6A4 |
| beta-sitosterol | OPRM1  |
| beta-sitosterol | GABRA1 |
| beta-sitosterol | CHRNA7 |
| beta-sitosterol | N/A    |
| beta-sitosterol | BCL2   |
| beta-sitosterol | BAX    |
| beta-sitosterol | CASP9  |
| beta-sitosterol | JUN    |
| beta-sitosterol | CASP3  |
| beta-sitosterol | CASP8  |
| beta-sitosterol | PRKCA  |
| beta-sitosterol | TGFB1  |
| beta-sitosterol | PON1   |
| beta-sitosterol | MAP2   |
| Stigmasterol    | PGR    |
| Stigmasterol    | NR3C2  |
| Stigmasterol    | NCOA2  |
| Stigmasterol    | ADH1C  |
| Stigmasterol    | IGHG1  |
| Stigmasterol    | RXRA   |
| Stigmasterol    | NCOA1  |
| Stigmasterol    | PTGS1  |
| Stigmasterol    | PTGS2  |
| Stigmasterol    | ADRA2A |
| Stigmasterol    | SLC6A2 |
| Stigmasterol    | SLC6A3 |
| Stigmasterol    | ADRB2  |
| Stigmasterol    | AKR    |
| Stigmasterol    | PLAU   |
| Stigmasterol    | LTA4H  |
| Stigmasterol    | MAOB   |
| Stigmasterol    | MAOA   |
| Stigmasterol    | PRKACA |

|                    |        |
|--------------------|--------|
| Stigmasterol       | CTRB1  |
| Stigmasterol       | CHRM3  |
| Stigmasterol       | CHRM1  |
| Stigmasterol       | ADRB1  |
| Stigmasterol       | SCN5A  |
| Stigmasterol       | HTR2A  |
| Stigmasterol       | ADRA1A |
| Stigmasterol       | GABRA3 |
| Stigmasterol       | CHRM2  |
| Stigmasterol       | ADRA1B |
| Stigmasterol       | GABRA1 |
| Stigmasterol       | CHRNA7 |
| senkyunolide-C     | PTGS1  |
| senkyunolide-C     | CHRM1  |
| senkyunolide-C     | PTGS2  |
| senkyunolide-C     | CHRM2  |
| senkyunolide-C     | ADRA2B |
| senkyunolide-C     | ADRB2  |
| senkyunolide-C     | SLC6A4 |
| senkyunolide-C     | GABRA1 |
| senkyunolide-C     | MAOB   |
| senkyunolide-C     | PRKACA |
| senkyunolide-C     | PKIA   |
| senkyunolide-D     | PTGS2  |
| senkyunolide-D     | NOS3   |
| senkyunolide-D     | GABRA1 |
| senkyunolide-D     | GRIA2  |
| senkyunolide-D     | GABRA6 |
| senkyunolide-E     | PTGS1  |
| senkyunolide-E     | CHRM1  |
| senkyunolide-E     | SCN5A  |
| senkyunolide-E     | PTGS2  |
| senkyunolide-E     | SLC6A2 |
| senkyunolide-E     | ADRA2B |
| senkyunolide-E     | ADRB2  |
| senkyunolide-E     | SLC6A4 |
| senkyunolide-E     | GABRA1 |
| senkyunolide-E     | MAOB   |
| senkyunolide-E     | PRKACA |
| FERULIC ACID (CIS) | PTGS1  |
| FERULIC ACID (CIS) | PTGS2  |
| FERULIC ACID (CIS) | NOS3   |
| FERULIC ACID (CIS) | ADRA2A |
| FERULIC ACID (CIS) | SLC6A2 |
| FERULIC ACID (CIS) | ADRA2B |
| FERULIC ACID (CIS) | SLC6A3 |
| FERULIC ACID (CIS) | ADRB2  |
| FERULIC ACID (CIS) | LTA4H  |
| FERULIC ACID (CIS) | MAOB   |
| FERULIC ACID (CIS) | MAOA   |
| FERULIC ACID (CIS) | PRKACA |
| FERULIC ACID (CIS) | CTRB1  |
| FERULIC ACID (CIS) | CHRM2  |
| beta-Chamigrene    | PTGS2  |
| beta-Chamigrene    | SLC6A2 |
| beta-Chamigrene    | MAOB   |
| beta-Chamigrene    | NCOA2  |
| beta-Chamigrene    | PTGS1  |

|                 |        |
|-----------------|--------|
| beta-Chamigrene | CHRM3  |
| beta-Chamigrene | CHRM1  |
| beta-Chamigrene | GABRA2 |
| beta-Chamigrene | RXRA   |
| beta-Chamigrene | GABRA3 |
| beta-Chamigrene | CHRM2  |
| beta-Chamigrene | ADRA1B |
| beta-Chamigrene | GABRA1 |
| beta-Chamigrene | GABRA6 |
| beta-Chamigrene | CHRNA2 |
| beta-Chamigrene | CHRNA7 |
| beta-Chamigrene | GABRA5 |
| beta-Chamigrene | ADRA1A |
| beta-Chamigrene | GABRA4 |
| ()-Cuparene     | CHRM3  |
| ()-Cuparene     | N/A    |
| ()-Cuparene     | CHRM1  |
| ()-Cuparene     | GABRA2 |
| ()-Cuparene     | ACHE   |
| ()-Cuparene     | GABRA5 |
| ()-Cuparene     | GABRA3 |
| ()-Cuparene     | CHRM2  |
| ()-Cuparene     | ADRA1B |
| ()-Cuparene     | GABRA1 |
| ()-Cuparene     | DPP4   |
| ()-Cuparene     | GRIA2  |
| ()-Cuparene     | GABRA6 |
| ()-Cuparene     | PTGS1  |
| ()-Cuparene     | DRD1   |
| ()-Cuparene     | SCN5A  |
| ()-Cuparene     | PTGS2  |
| ()-Cuparene     | RXRA   |
| ()-Cuparene     | SLC6A2 |
| ()-Cuparene     | ADRA1A |
| ()-Cuparene     | SLC6A3 |
| ()-Cuparene     | ADRB2  |
| ()-Cuparene     | SLC6A4 |
| ()-Cuparene     | PDE3A  |
| ()-Cuparene     | ADRA1D |
| ()-Cuparene     | CHRNA2 |
| ()-Cuparene     | ESR1   |
| ()-Cuparene     | ADRA2A |
| vanillin        | MAOB   |
| vanillin        | MAOA   |
| vanillin        | LYZ    |
| vanillin        | N/A    |
| vanillin        | PTGS2  |
| vanillin        | GABRA1 |
| vanillin        | ADH1C  |
| vanillin        | N/A    |
| vanillin        | MMP9   |
| vanillin        | MAPK1  |
| vanillin        | JUN    |
