# Supplementary material for: Network Pharmacology-Based Strategy to Investigate Pharmacological Mechanisms of the Drug Pair Astragalus-Angelica for Treatment of Male Infertility
Source: Evid Based Complement Alternat Med. 2021 Oct 16;2021:8281506. doi: 10.1155/2021/8281506 (PMC8541871; doi:10.1155/2021/8281506)
Supplement: Supplementary Materials — Table S1: available ingredient and target information of Astragalus collected in TCMSP database. Table S2: available ingredient and target information of Astragalus collected in BATMAN-TCM database. Table S3: available ingredient and target information of Angelica collected in TCMSP database. Table S4: available ingredient and target information of Angelica collected in BATMAN-TCM database. Table S5: The drug pair-component-node data of target-disease regulation network. [file 8281506.f1.zip]

Archive with 5 entries (5 files):
- 8281506.f1/Table S1. Available ingredient and target information of Astragalus collected in tcmsp database..pdf
- 8281506.f1/Table S2. Available ingredient and target information of Astragalus collected in BATMAN-TCM database.pdf
- 8281506.f1/Table S3. Available ingredient and target information of Angelicacollected in tcmsp database.pdf
- 8281506.f1/Table S4. Available ingredient and target information of Angelicacollected in BATMAN-TCM database.pdf
- 8281506.f1/Table S5.The drug pair-component-Node data oftarget-disease regulation network.pdf
